# Supplementary material for: Energy harvesting by vitrimer-based moist-electric generators
Source: Royal Society of Chemistry journal article supplement (doi:10.1039/d1ta11029b), 2022-01-01
Supplement: d1ta11029b4.pdf [file d1ta11029b4.pdf]

**Electronic Supplementary Materials (ESI)**

**Energy Harvesting by Vitriimer-Based Moist-Electric Generator**

Zihao Feng,<sup>a</sup> Wei Zhao,<sup>\*a</sup> Zhengxin Yang,<sup>a</sup> Yi Deng,<sup>a</sup> Tong Yang,<sup>a</sup> Yonghao Ni<sup>b</sup>

<sup>a</sup> College of Bioresources Chemical and Materials Engineering, Shaanxi University of Science and Technology, Xi'an 710021, P. R. China

<sup>b</sup> Department of Chemical Engineering, University of New Brunswick, Fredericton E3B 5A3, New Brunswick, Canada

\*Correspondence to: [zhwgah1028@126.com](mailto:zhwgah1028@126.com)

**The PDF file includes:**

Supplementary Information

**Fig. S1** *In situ* FT-IR monitoring of the reaction between BCC and TREN

**Fig. S2** ATR FI-IR spectra of the PHU sheet before and after water immersion.

**Fig. S3** TGA and DSC results of PHU after water immersion for different times.

**Fig. S4** Voltage Output of PHU-VMEG (Cu/Cu) at different temperatures with 60% RH.

**Fig. S5** Voltage output of PHU-VMEG (Cu or Al/Cu) (90°C, water dripping).

**Fig. S6** Scratch self-healing monitoring of PHU at 160°C by polarizing microscopy.

**Fig. S7** Mechanical properties and voltage output of PHU after self-healing from damages.

**Fig. S8** Preparation and characterizations of PHU@Ti<sub>3</sub>C<sub>2</sub> composite.

**Fig. S9** Photothermal conversion effect of PHU@Ti<sub>3</sub>C<sub>2</sub> composite.

**Fig. S10** Mechanical properties of PHU@Ti<sub>3</sub>C<sub>2</sub> after immersion in water for different times.

**Fig. S11** Voltage outputs of PHU@Ti<sub>3</sub>C<sub>2</sub> with different contents of Ti<sub>3</sub>C<sub>2</sub>.

**Fig. S12.** Voltage outputs of PHU@Ti<sub>3</sub>C<sub>2</sub> with different irradiation areas.

**Fig. S13** Thermally/light-induced self-healing of PHU@Ti<sub>3</sub>C<sub>2</sub>.

**Fig. S14** Scratch self-healing monitoring of PHU@Ti<sub>3</sub>C<sub>2</sub> by polarizing microscopy (160°C, 10s).

**Fig. S15** Mechanical properties and voltage output of PHU@Ti<sub>3</sub>C<sub>2</sub> after self-healing from damages.

**Fig. S16** Mechanical properties and light transmittance of blank paper, PHU and PHU@Paper.

**Fig. S17** Preparation of PHU@Paper with different thicknesses and areas.

**Fig. S18** Electricity generation performance of PHU@Paper-VMEG with different thicknesses and areas.

**Fig. S19** Voltage output of PHU@Paper-VMEG (Cu/Cu) with different thicknesses and areas (90°C,

60% RH).

**Fig. S20** Voltage output of PHU@Paper-VMEG (Cu/Cu) with different thicknesses and areas (90°C, dripping water).

**Fig. S21** Voltage output of PHU@Paper-VMEG (Al/Cu) with different thicknesses and areas (90°C, dripping water).

**Fig. S22** Scratch self-healing monitoring of PHU@Paper by polarizing microscopy (160°C, 10s).

**Fig. S23** Mechanical properties and voltage output of PHU@Paper after self-healing from damages.

**Fig. S24** Effect of the line width of copper electrodes on the voltage output of PHU@Paper-VMEG with spiral electrodes.

**Fig. S25** Voltage output of PHU@Paper-VMEG (Cu/Cu) with different line widths of ring-shaped electrodes.

**Fig. S26** Effect of the ring number of ring-shaped copper electrodes on the voltage output of PHU@Paper-VMEG.

**Fig. S27** Voltage output of PHU@Paper-VMEG (Cu/Cu) with different ring number electrodes.

**Fig. S28** Voltage output of PHU@Paper-VMEG (Cu/Cu) with different patterns of electrodes. (leaf, flower, snowflake and spider web).

**Fig. S29** Effect of Al electrodes on the voltage output of PHU@Paper-VMEG (Al/Cu).

**Fig. S30** Voltage output of PHU@Paper-VMEG (Al/Cu) with different patterns of electrodes.

**Fig. S31** Scratch self-healing monitoring of PHU@Ti<sub>3</sub>C<sub>2</sub> by polarizing microscopy (160°C, 10s).

**Fig. S32** Mechanical properties and voltage output of PHU@Ti<sub>3</sub>C<sub>2</sub>@Paper after self-healing from damages.

**Other Supplementary Materials for this manuscript include the followings:**

**Movie S1** PHU@Ti<sub>3</sub>C<sub>2</sub> infrared thermal imaging video.

**Movie S2** Electronic timer powered by four PHU@Ti<sub>3</sub>C<sub>2</sub>-VMEG units.

**Movie S3** Electronic timer powered by two PHU@Ti<sub>3</sub>C<sub>2</sub>@Paper-VMEG units.

## Supplementary Figures

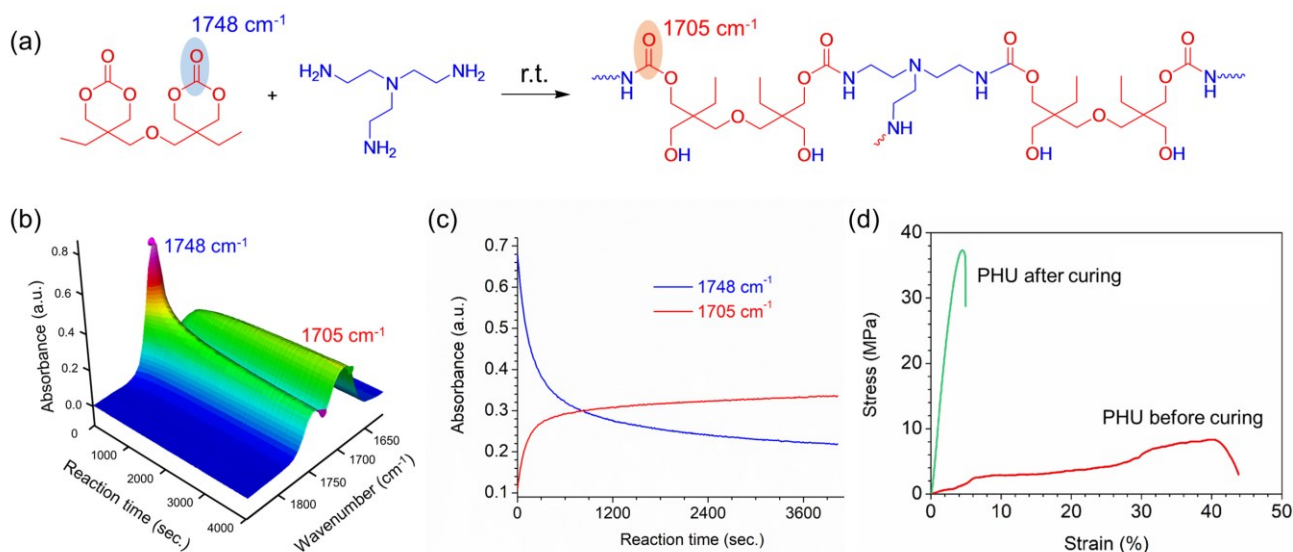

**Fig. S1** *In situ* FT-IR monitoring of the reaction between BCC and TREN (conditions: [BCC]=2.20M, [TREN]=0.73M, 25 °C, CH<sub>2</sub>Cl<sub>2</sub>). (a) Reaction scheme of BCC and TREN; (b) Corresponding 3D kinetic behavior profile from *in situ* FT-IR; (c) Absorbance of 1748cm<sup>-1</sup> and 1705cm<sup>-1</sup> with reaction time. (d) Mechanical properties of PHU vitrimer before and after curing at 90°C for 12 h.

### Discussion of Fig. S1:

The reaction between bis(6-membered cyclic carbonate) (BCC) and tris(2-aminoethyl)amine (TREN) at room temperature was monitored by using *in situ* attenuated total reflectance (ATR) Fourier transform infrared (FT-IR) technique. An ATR diamond probe was connected to the reaction flask via AgX Fiber. Sampling was performed from 2800 to 650 cm<sup>-1</sup> at 8 wavenumber resolution, and the automatic sampling interval was 10 s. The real-time concentration of BCC was quantified by measuring the intensity of the carbonyl peak of BCC at 1748 cm<sup>-1</sup>. The experimental results showed that BCC could react with TREN to form PHU vitrimer at room temperature in 1 h. In addition, the mechanical property of PHU before and after heating at 90°C for 12 h was also investigated. The

PHU after further heating at 90°C for 12 h possessed a very high strength of 37 MPa (almost 5 times higher than that of the uncured PHU), indicating further curing at a high temperature can result in dense cross-linked networks of PHU.

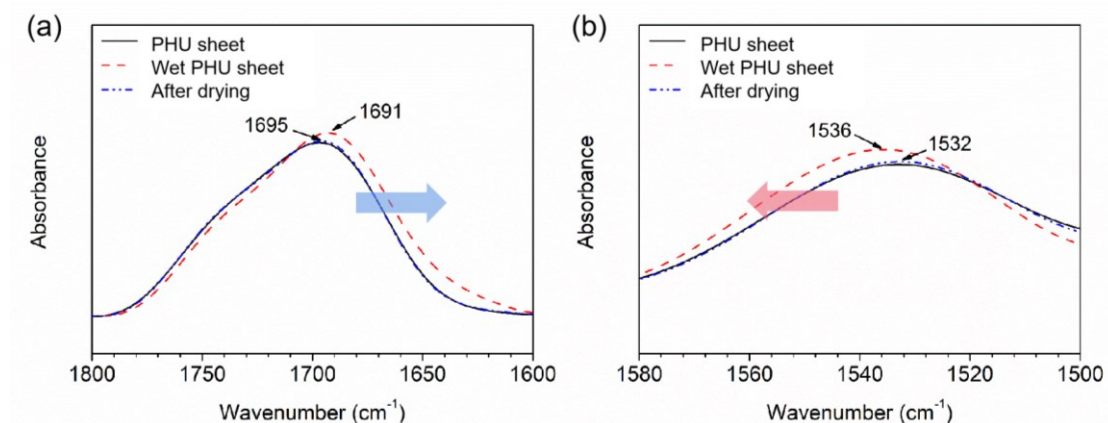

**Fig. S2** ATR FI-IR spectra of the PHU film before and after water immersion. (a) Expanded N-H stretching region. (b) Expanded C=O stretching region.

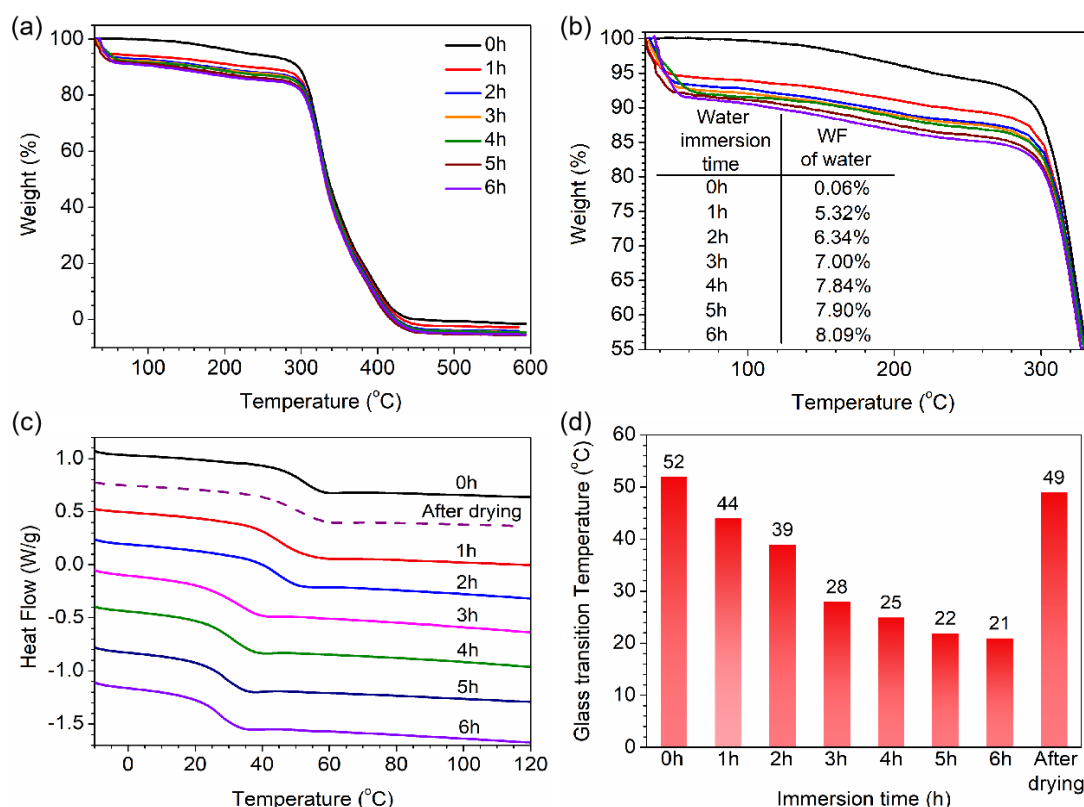

**Fig. S3** TGA and DSC results of PHU after water immersion for different times. (a) TGA curves; (b) Expansion of TGA curves from 30 to 340°C; (c) DSC curves; (d) Column chart of  $T_g$  vs water immersion time.

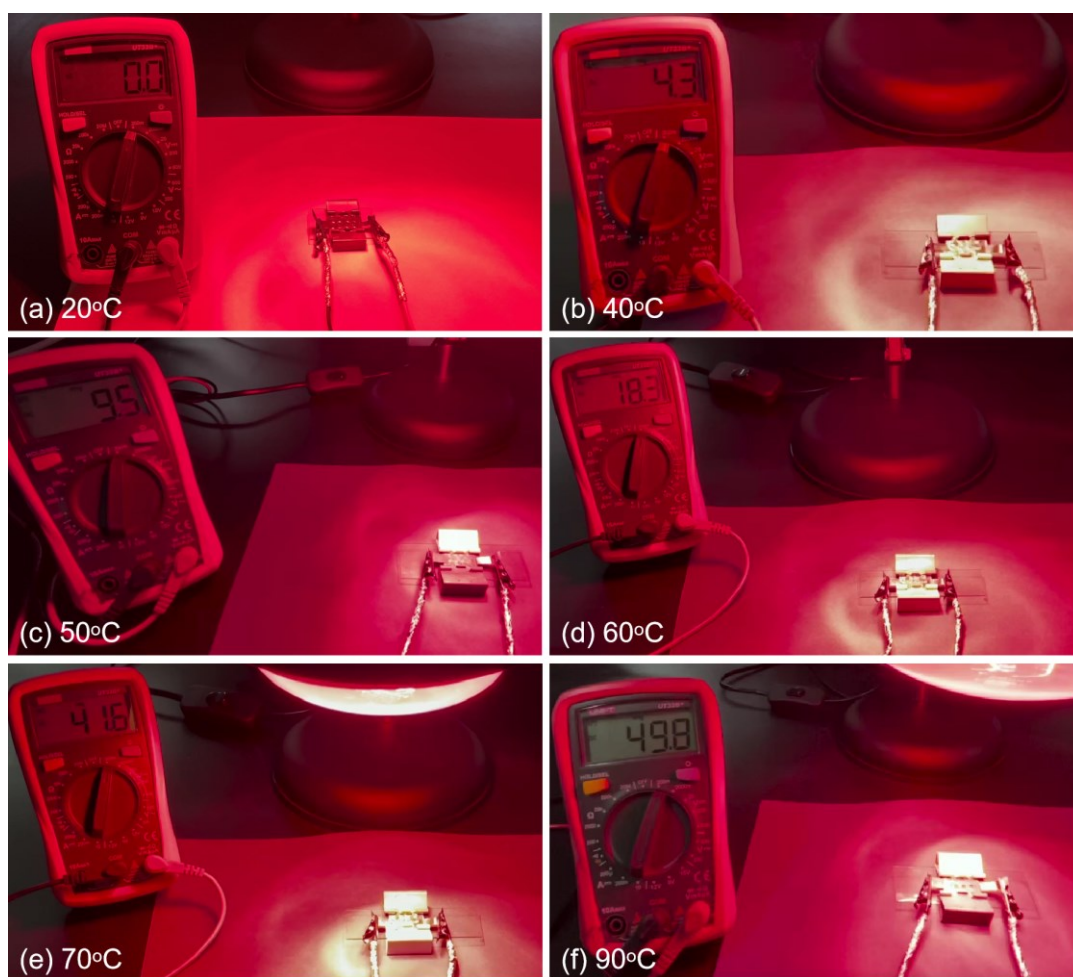

**Fig. S4** Voltage output of the PHU-VMEG (Cu/Cu) at different temperatures with 60% RH (the working temperature of VMEG was adjusted by changing distance between infrared lamp and VMEG. An infrared thermometer was used to measure the working temperature of MEG).

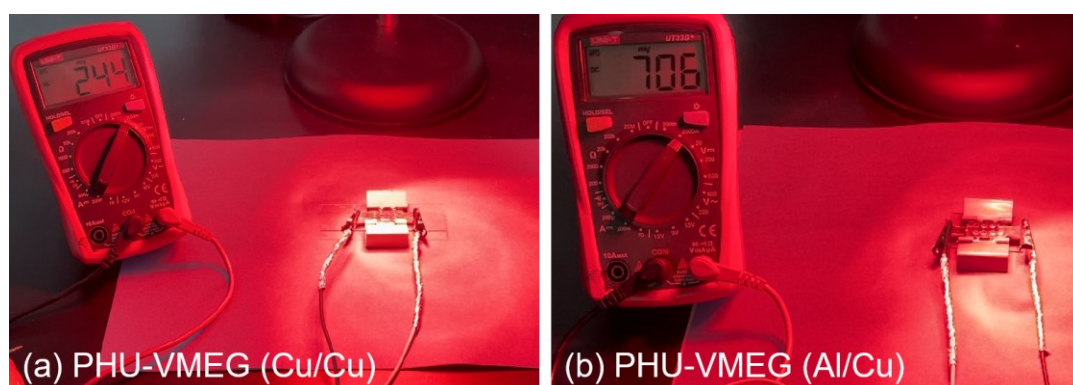

**Fig. S5** Voltage output of PHU-VMEG (Cu or Al/Cu) (90°C, water dripping). (a) PHU-VMEG (Cu/Cu), (b) PHU-VMEG (Al/Cu).

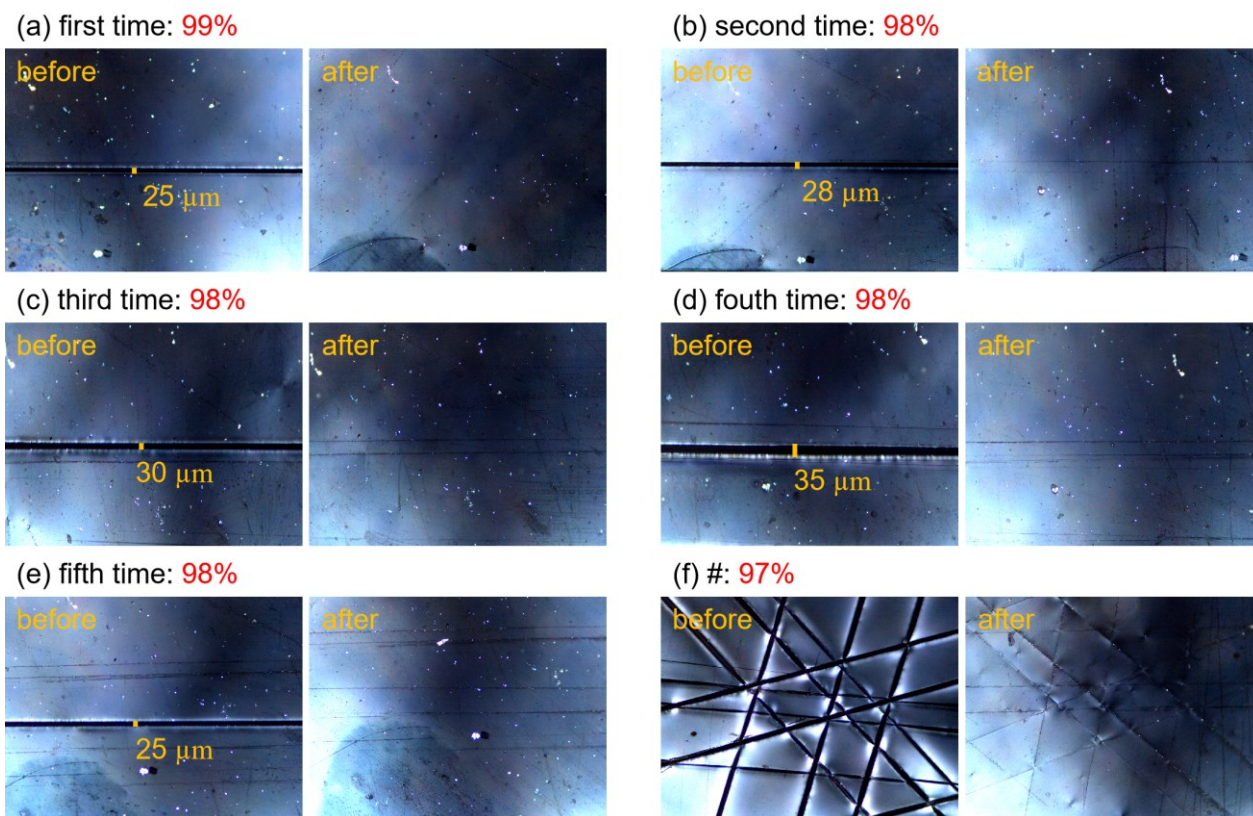

**Fig. S6** Scratch self-healing monitoring of PHU at 160°C by polarizing microscopy. (a-e) five cycles of “scratch/self-healing” at roughly the same place of PHU; (f) self-healing of PHU with multiple scratches.

#### Discussion of Fig. S6 and Fig. S7:

Five cycles of “scratching/self-healing” were first performed at roughly the same place of PHU and the mechanical and output voltage performances of PHU after each cycle of self-healing were investigated. In addition, multiple scratches were made on the surface of PHU and the corresponding performances after self-healing were also investigated. The experimental results showed that there was only a slight decrease of the mechanical properties after self-healing and no effect on the output voltage properties was observed. This is because that covalent-bond based cross-linking networks can quickly rebuild between the damaged surfaces of PHU at a high temperature via highly efficient transcarbamoylation reactions between the hydroxyl groups (-OH) and carbamates (-NHCOO-).



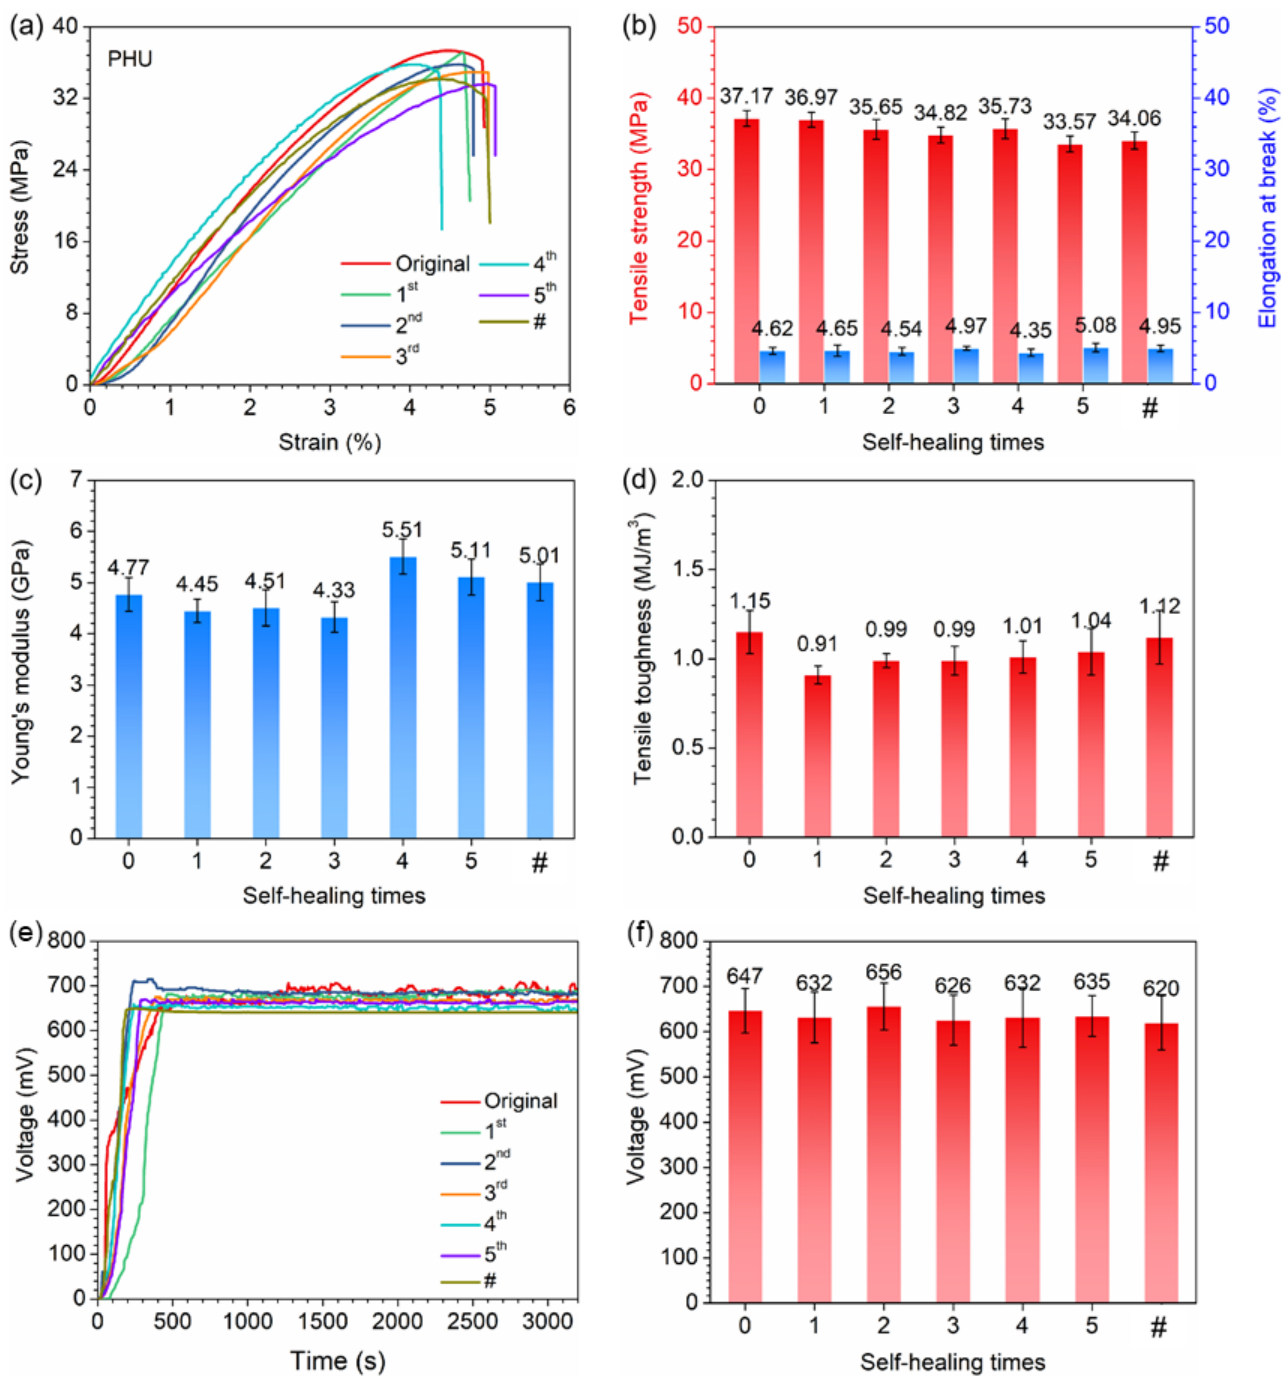

**Fig. S7** (a)-(d) Mechanical properties of PHU after each cycle of self-healing in “scratching/self-healing” cycling experiments; (e) Real-time monitoring of the voltage outputs of PHU-VMEG (Al/Cu) after each cycle of self-healing; (f) Stable voltages outputs of PHU-VMEG (Al/Cu) after each cycle of self-healing.

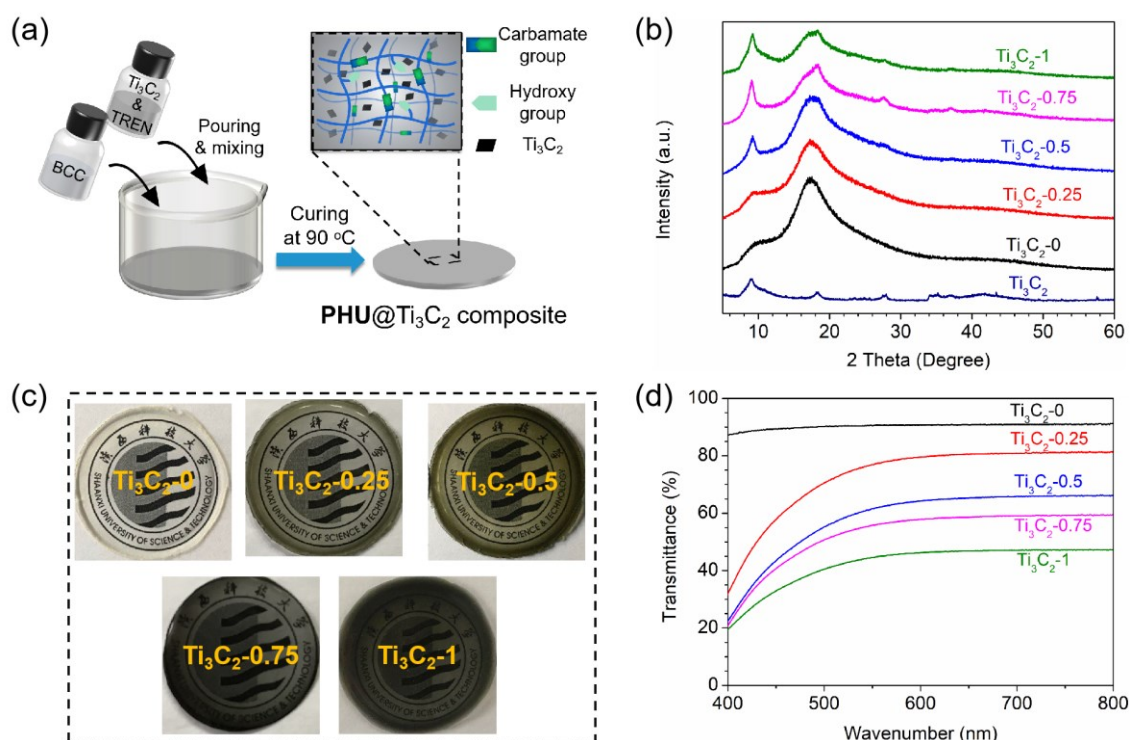

**Fig. S8** Preparation and characterizations of PHU@Ti<sub>3</sub>C<sub>2</sub> composite. (a) Preparation process of PHU@Ti<sub>3</sub>C<sub>2</sub> composites. (b) XRD patterns for PHU, Ti<sub>3</sub>C<sub>2</sub> and PHU@Ti<sub>3</sub>C<sub>2</sub> composites. (c) Photographs of PHU@Ti<sub>3</sub>C<sub>2</sub> composites. (d) Optical transmittance spectra of PHU@Ti<sub>3</sub>C<sub>2</sub> composites.

#### Discussion of Fig. S8:

The PHU vitrimer composites with different contents of Ti<sub>3</sub>C<sub>2</sub> (0 wt%, 0.25 wt%, 0.5 wt%, 0.75 wt% and 1 wt%) are named Ti<sub>3</sub>C<sub>2</sub>-0, Ti<sub>3</sub>C<sub>2</sub>-0.25, Ti<sub>3</sub>C<sub>2</sub>-0.5, Ti<sub>3</sub>C<sub>2</sub>-0.75 and Ti<sub>3</sub>C<sub>2</sub>-1 (Fig. S5). The PHU and Ti<sub>3</sub>C<sub>2</sub> composites (PHU@Ti<sub>3</sub>C<sub>2</sub> composites) were studied by XRD. As shown in Fig. S5b, the (002) peak intensity at 9.5° of the Ti<sub>3</sub>C<sub>2</sub> in PHU@Ti<sub>3</sub>C<sub>2</sub> composites augments with the increased Ti<sub>3</sub>C<sub>2</sub> loading. The optical properties of the films were measured. Fig. S5d show the optical transmittance of the films with different contents of Ti<sub>3</sub>C<sub>2</sub>. Although the light transmittance gradually decreases with the increase in the Ti<sub>3</sub>C<sub>2</sub> content, it still maintains good light transmittance in the visible light range (the average thickness of the film is 0.6mm).

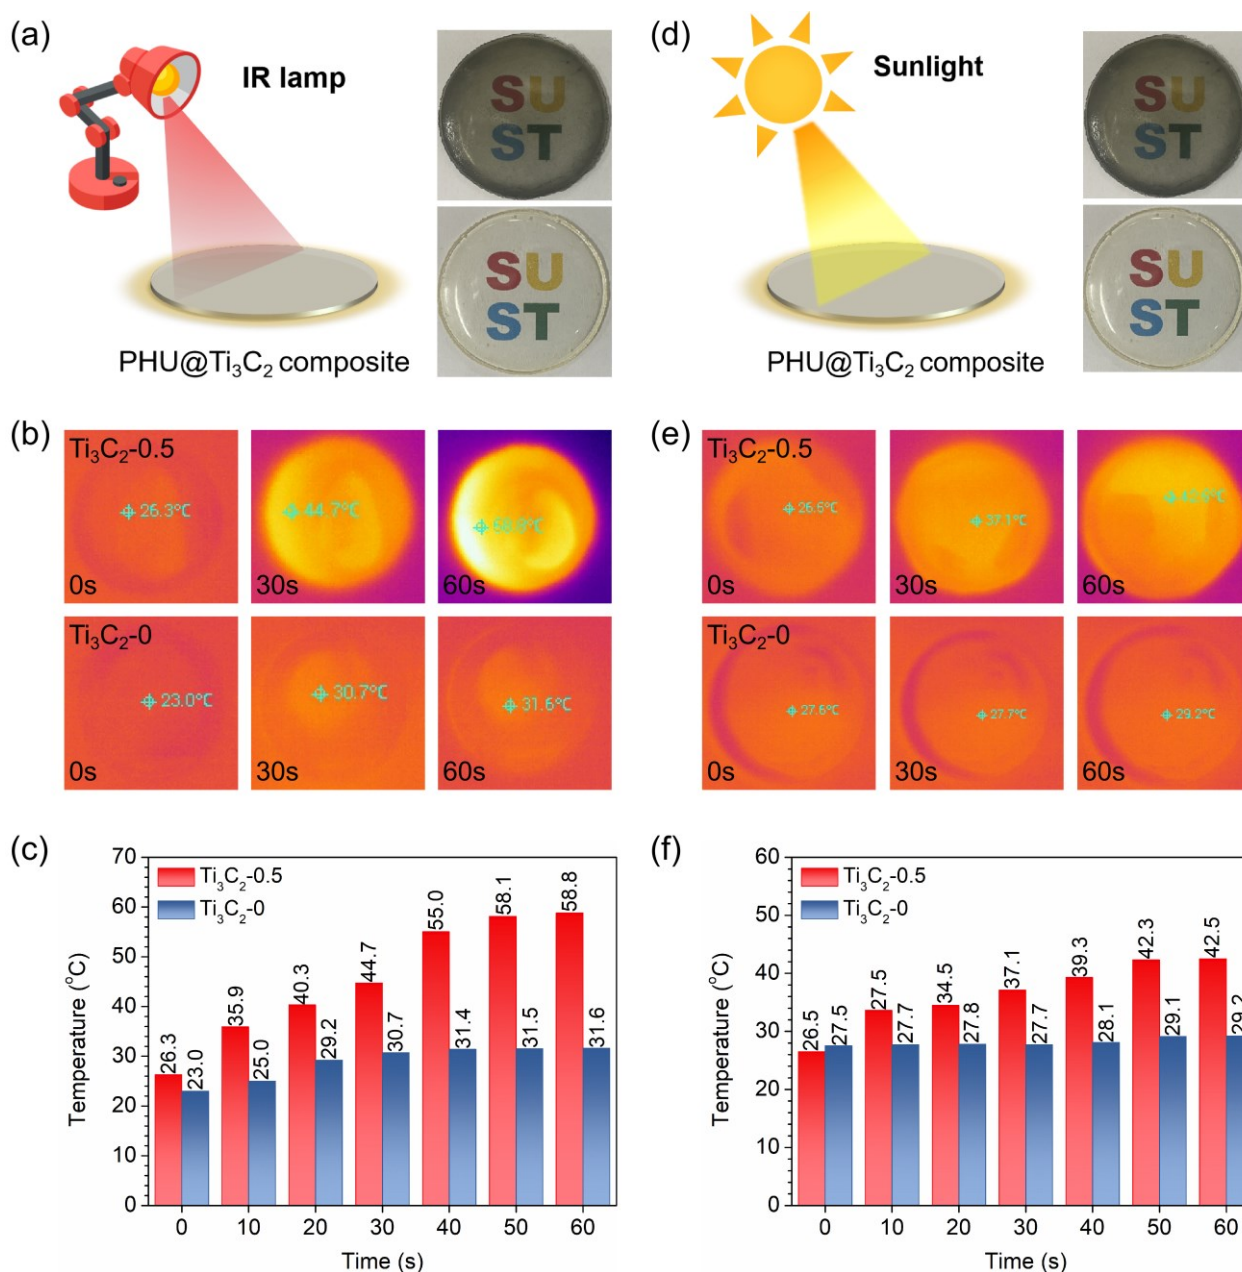

**Fig. S9** Photothermal conversion effect of PHU@Ti<sub>3</sub>C<sub>2</sub> composite. (a) Schematic diagram of PHU@Ti<sub>3</sub>C<sub>2</sub> or PHU irradiated by IR lamp (780 nm, 100W); (b) IR images of the PHU@Ti<sub>3</sub>C<sub>2</sub> and PHU taken at different times under IR radiation; (c) Temperature changes of PHU@Ti<sub>3</sub>C<sub>2</sub> and PHU vs. IR radiation time.; (d) Schematic diagram of PHU@Ti<sub>3</sub>C<sub>2</sub> or PHU exposed to sunlight; (e) IR images of the PHU@Ti<sub>3</sub>C<sub>2</sub> and PHU taken at different times under sunlight at 1 PM (October 17, 2020, Xi'an, China, the temperature was 8 to 20°C); (f) Temperature changes of PHU@Ti<sub>3</sub>C<sub>2</sub> and PHU vs. sunlight exposure time.

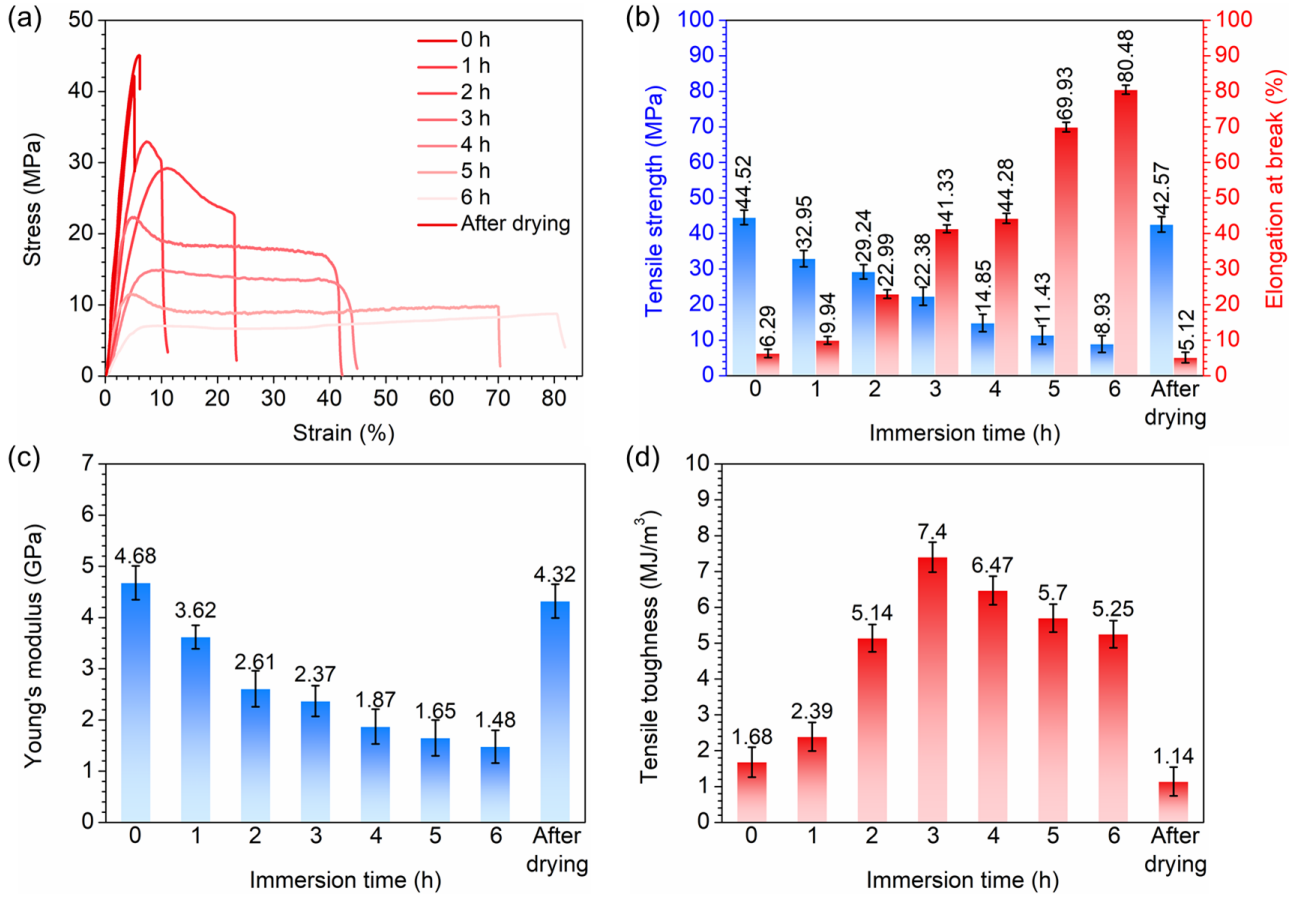

**Fig. S10** Mechanical properties of PHU@Ti<sub>3</sub>C<sub>2</sub> after immersion in water for different times. (a) Stress-strain relation after different hours of immersion; (b) Column chart of tensile strength and strain vs. immersion time; (c) Column chart of Young's Modulus vs. immersion time; (d) Column chart of tensile toughness vs. immersion time.

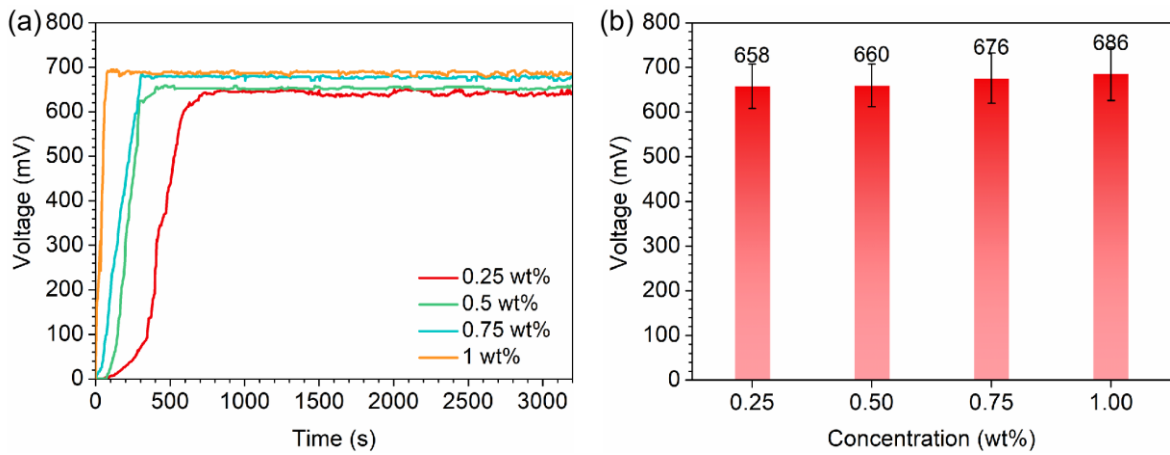

**Fig. S11** Voltage outputs of PHU@Ti<sub>3</sub>C<sub>2</sub> with different contents of Ti<sub>3</sub>C<sub>2</sub>.

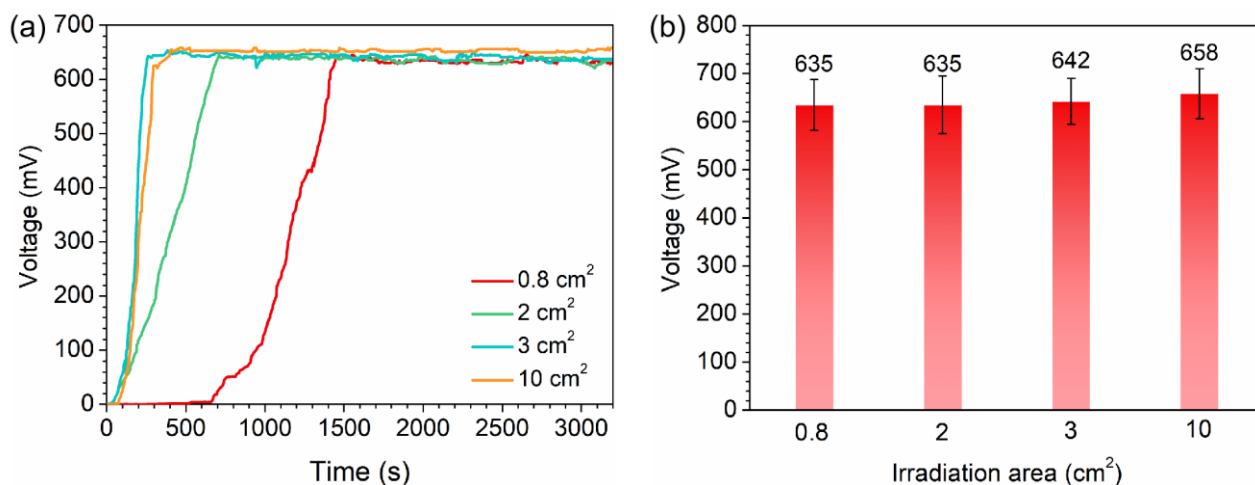

**Fig. S12** Voltage outputs of PHU@Ti<sub>3</sub>C<sub>2</sub> with different irradiation areas.

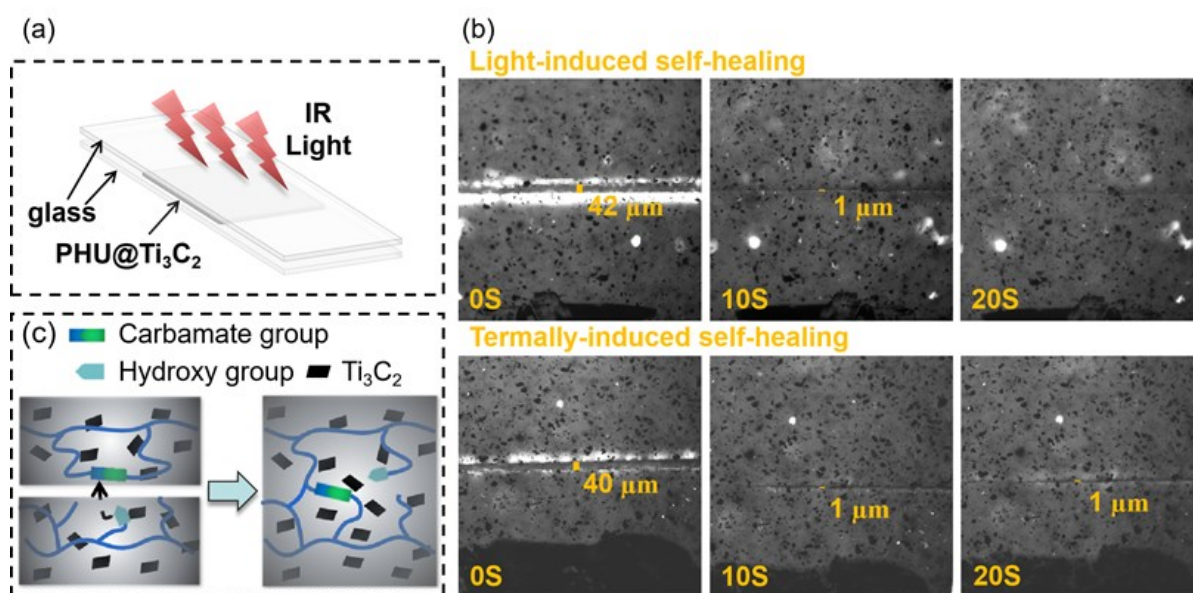

**Fig. S13** Thermally/light-induced self-healing of PHU@Ti<sub>3</sub>C<sub>2</sub>. (a) Schematic diagram of PHU@Ti<sub>3</sub>C<sub>2</sub> self-healing experiment. (b) Scratch self-healing at 160°C or under IR light monitored by polarizing microscope. (c) Mechanistic diagram of PHU@Ti<sub>3</sub>C<sub>2</sub> self-healing.

#### Discussion of Fig. S13:

In the self-healing experiments, a blade was first used to scratch on the surface of PHU@Ti<sub>3</sub>C<sub>2</sub> film, and then the self-healing of the scratches was examined by polarized light microscopy at 160°C and

infrared light irradiation, respectively. The rapid light-induced self-healing of PHU@Ti<sub>3</sub>C<sub>2</sub> is attributed to the addition of Ti<sub>3</sub>C<sub>2</sub>. In contrast to traditional 2D materials, such as GO, rGO, GNs, BN that exhibit only a broad absorption band ranging from UV to NIR region, Ti<sub>3</sub>C<sub>2</sub>, as one of the MXene's family, usually exhibits two enhanced absorption peaks at visible and near-infrared region due to the localized surface plasmon resonance (LSPR) effect, similar to metal nanoparticles, which results in light absorption enhancement. In addition, Ti<sub>3</sub>C<sub>2</sub> have a nearly 100% internal light-to-heat conversion efficiency. (*Adv. Funct. Mater.* **2020**, 2000712; *J. Mater. Chem. A* **2019**, 14319-14327.). Solar energy absorbed by Ti<sub>3</sub>C<sub>2</sub> can be efficiently converted into heat emitted into the surrounding medium through lattice scattering vibrations, thus raising the surrounding temperature. Thus, the addition of Ti<sub>3</sub>C<sub>2</sub> in PHU can enable efficient transcarbamoylation exchange reactions between hydroxyl groups and carbamates at the crack interface and facilitate the rapid light-induced self-healing of PHU@Ti<sub>3</sub>C<sub>2</sub>.

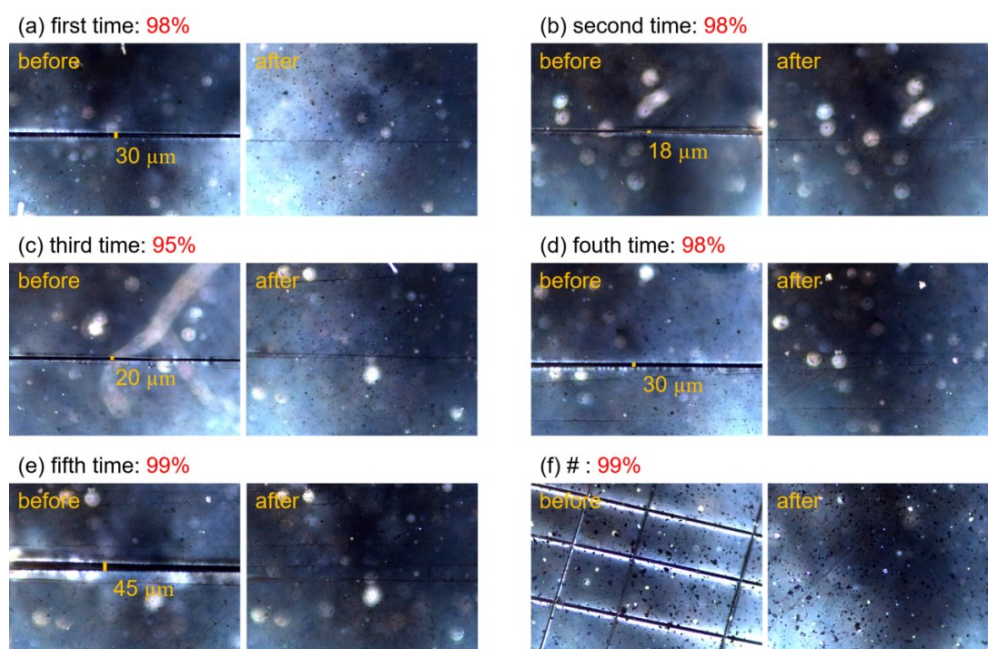

**Fig. S14** Scratch self-healing monitoring of PHU@Ti<sub>3</sub>C<sub>2</sub> by polarizing microscopy (160°C, 10s). (a-e) Five cycles of “scratching/self-healing” at roughly the same place of PHU@Ti<sub>3</sub>C<sub>2</sub>; (f) Self-healing of PHU@Ti<sub>3</sub>C<sub>2</sub> with multiple scratches.

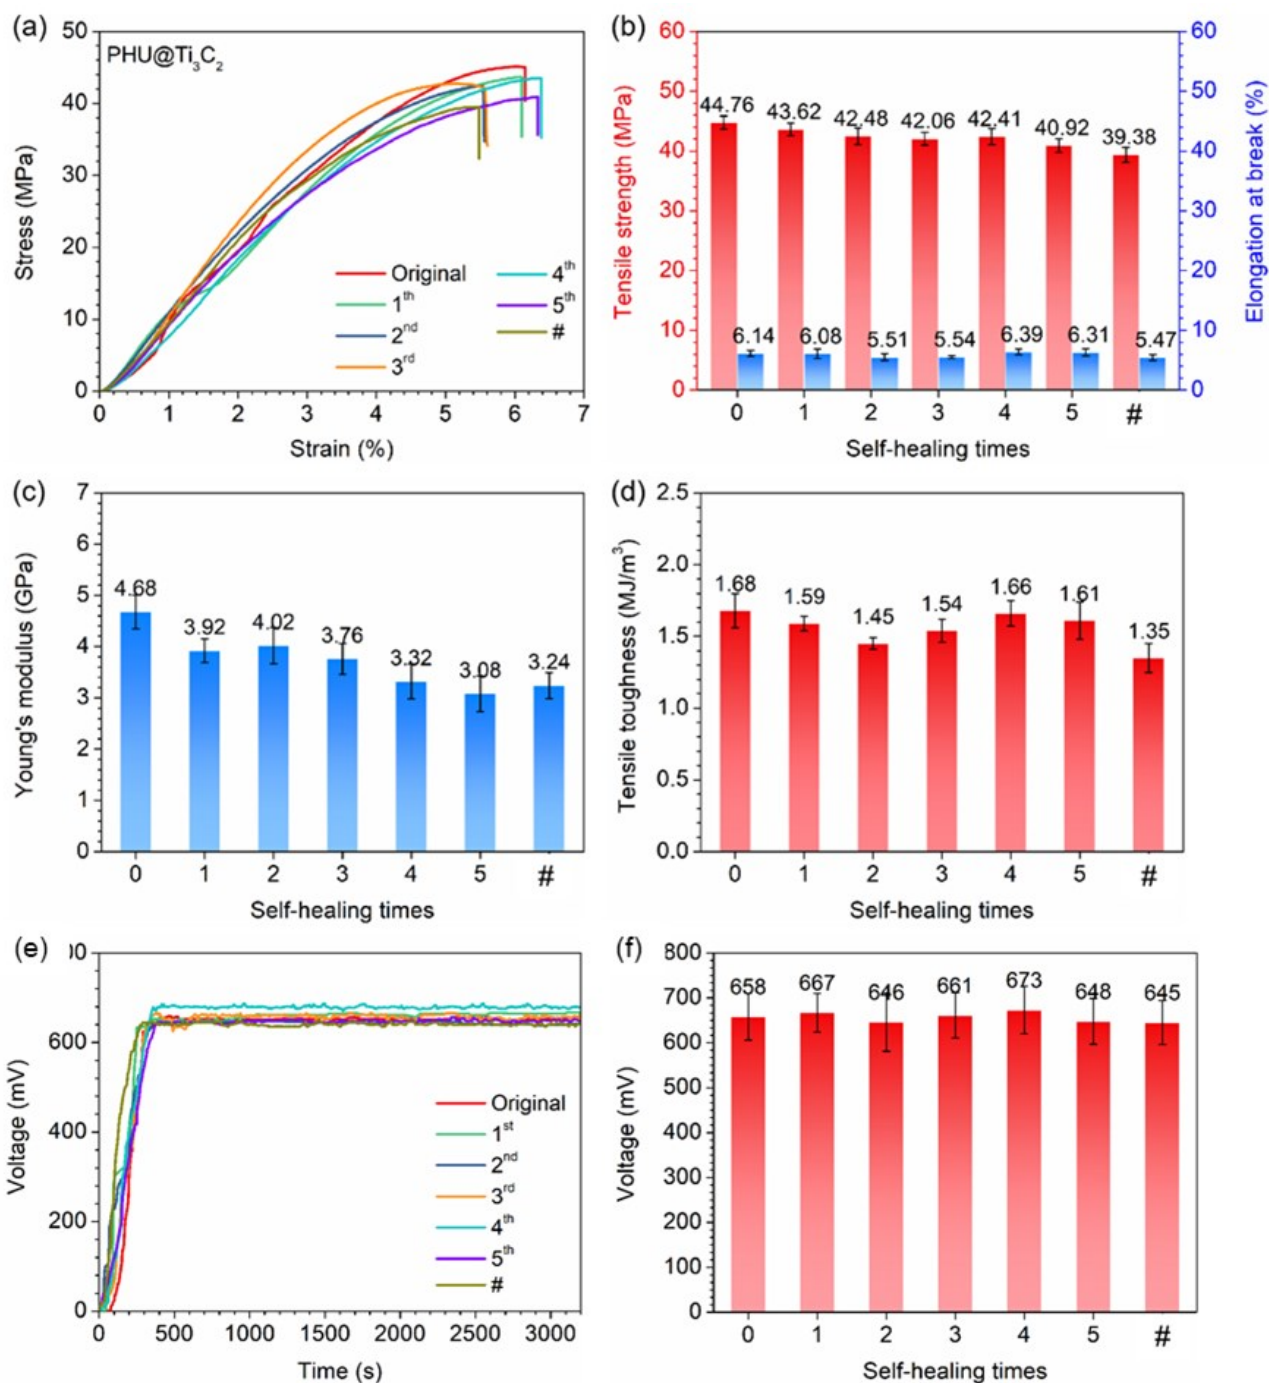

**Fig. S15** Mechanical properties and voltage outputs of PHU@Ti<sub>3</sub>C<sub>2</sub> after self-healing from damages. (a)-(d) Mechanical properties of PHU@Ti<sub>3</sub>C<sub>2</sub> after each instance of self-healing in “scratching/self-healing” cycling experiments; (e) Real-time monitoring of the voltage outputs of PHU@Ti<sub>3</sub>C<sub>2</sub>-VMEG (Al/Cu) after each instance of self-healing; (f) Stable voltages outputs of PHU@Ti<sub>3</sub>C<sub>2</sub>-VMEG (Al/Cu) after each instance of self-healing.

### Discussion of Fig. S14 and Fig. S15:

Five cycles of “scratching/self-healing” were first performed at roughly the same place of PHU@Ti<sub>3</sub>C<sub>2</sub> and the mechanical and output voltage performances of PHU@Ti<sub>3</sub>C<sub>2</sub> after each instance of self-healing were investigated. In addition, multiple scratches were made on the surface of PHU@Ti<sub>3</sub>C<sub>2</sub> and the corresponding performances after self-healing were also investigated. The experimental results showed that there was only a slight decrease of the mechanical properties after self-healing and no effect on the output voltage properties was observed. This is because that covalent-bond based cross-linking networks can quickly rebuild between the damaged surfaces of PHU@Ti<sub>3</sub>C<sub>2</sub> at high temperatures via highly efficient transcarbamylation reactions between the hydroxyl groups (-OH) and carbamates (-NHCOO-).

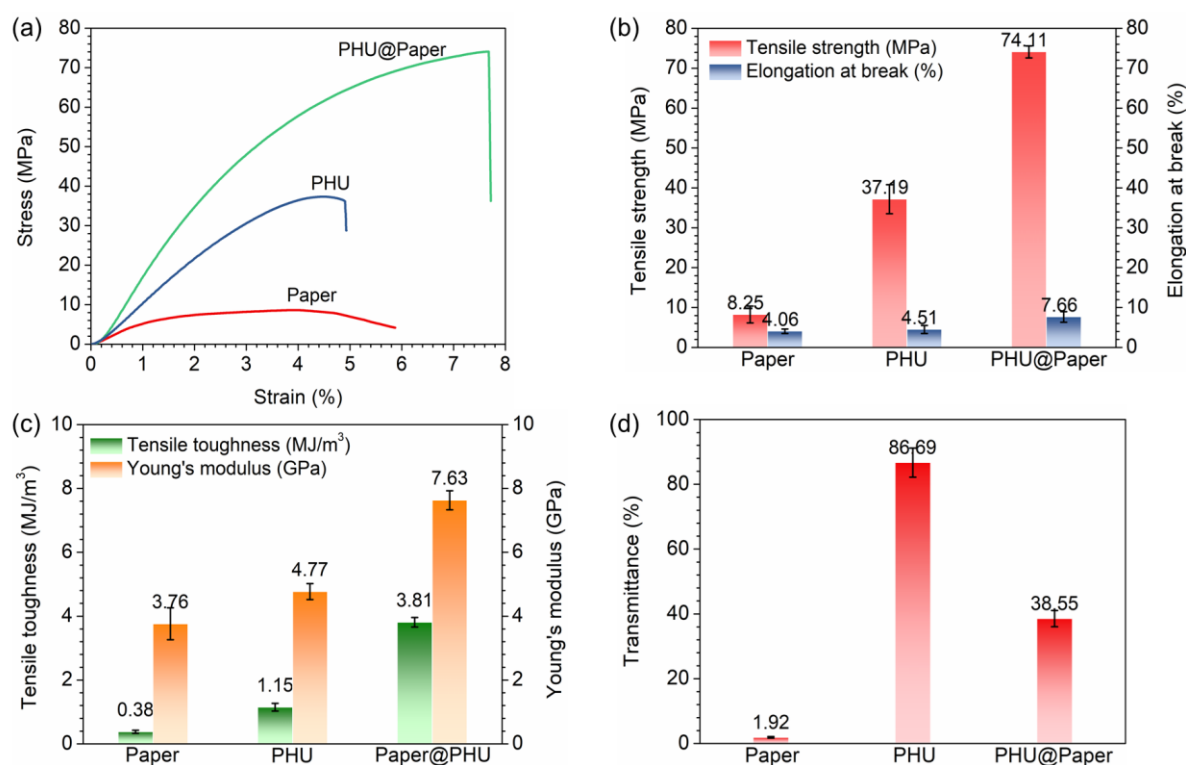

**Fig. S16** Mechanical properties and light transmittance of blank paper, PHU and PHU@Paper. (a) Stress-strain curves. (b) Tensile strength and elongation break. (c) Tensile toughness and Young's modulus. (d) Light transmittance.



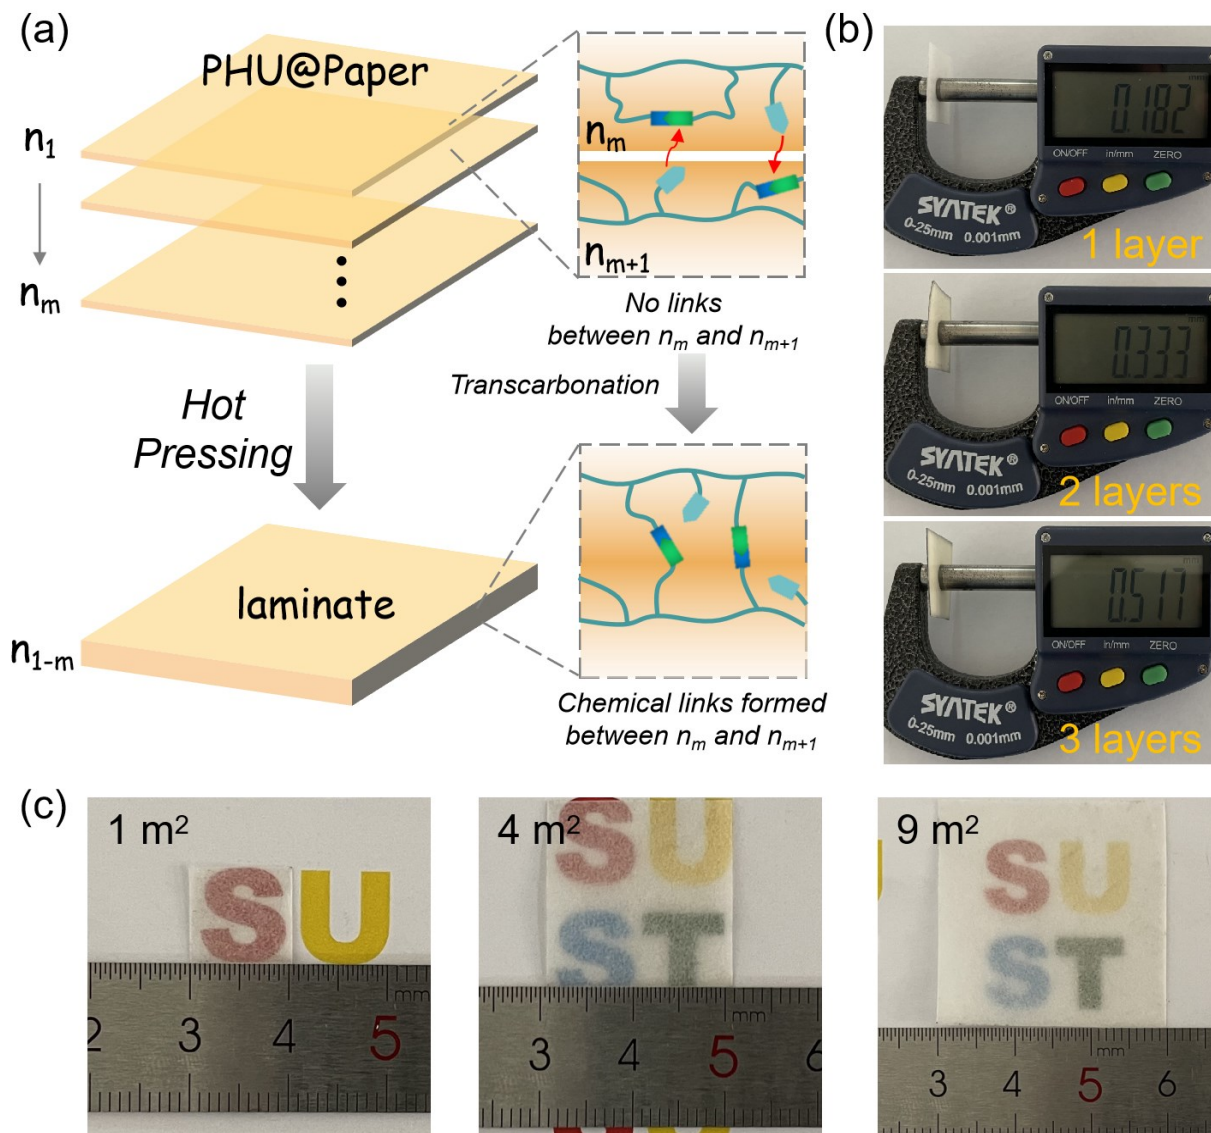

**Fig. S17** Preparation of PHU@Paper with different thicknesses and areas. (a) Preparation diagram; (b) Photographs of PHU@Paper with different thickness; (c) Photographs of PHU@Paper with different areas.

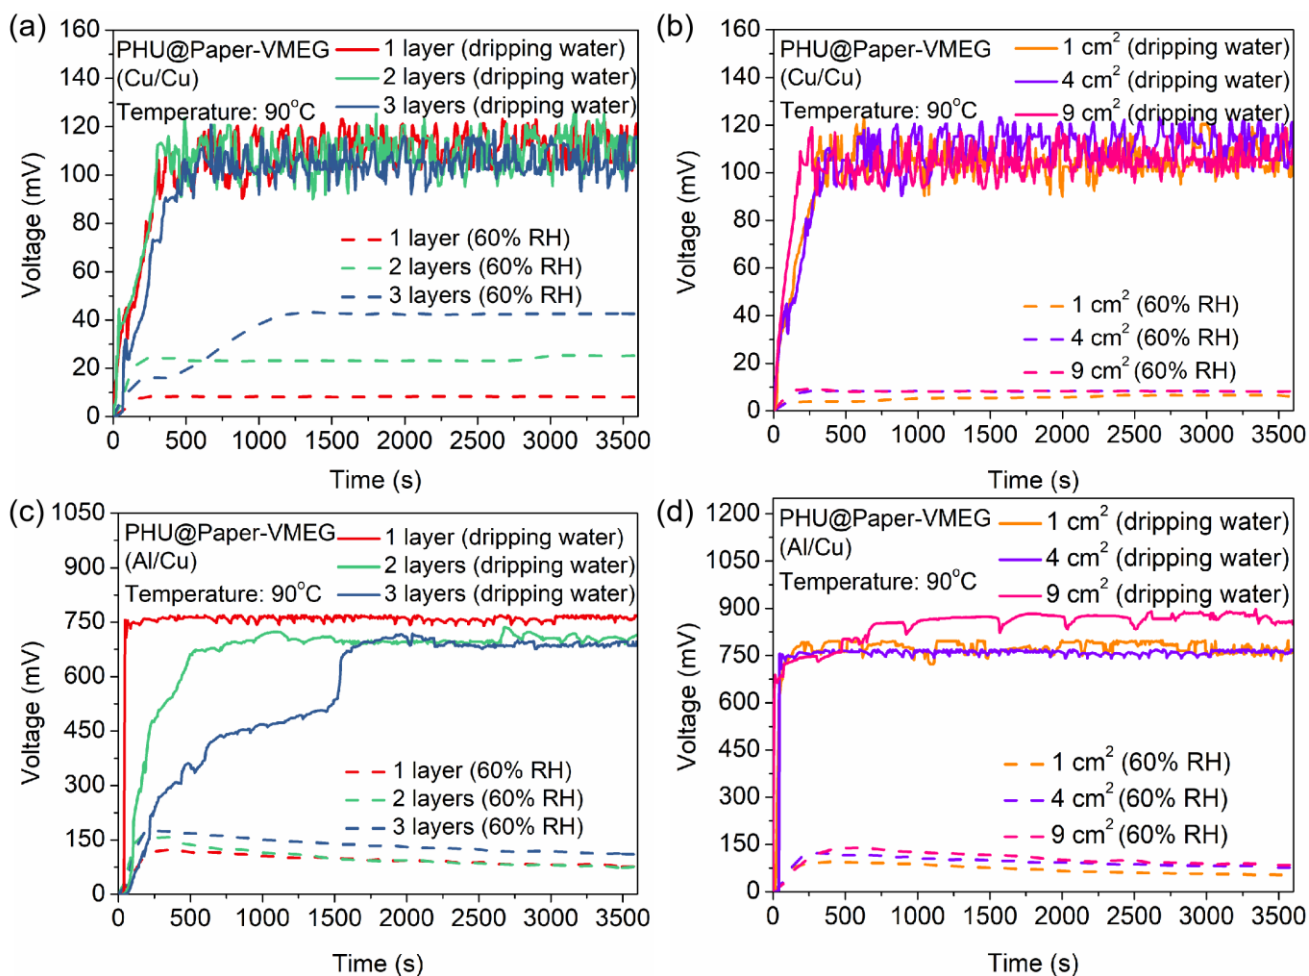

**Fig. S18** Electricity generation performance of PHU@Paper-VMEGs with different thicknesses and areas. (a) Voltage output of PHU@Paper-VMEGs (Cu/Cu) with different thicknesses; (b) Voltage output of PHU@Paper-VMEGs (Cu/Cu) with different areas; (c) Voltage output of PHU@Paper-VMEGs (Al/Cu) in different thicknesses; (d) Voltage output of PHU@Paper-VMEG (Al/Cu) in different areas.

PHU@Paper-VMEG (Cu/Cu), 90°C, 60% RH

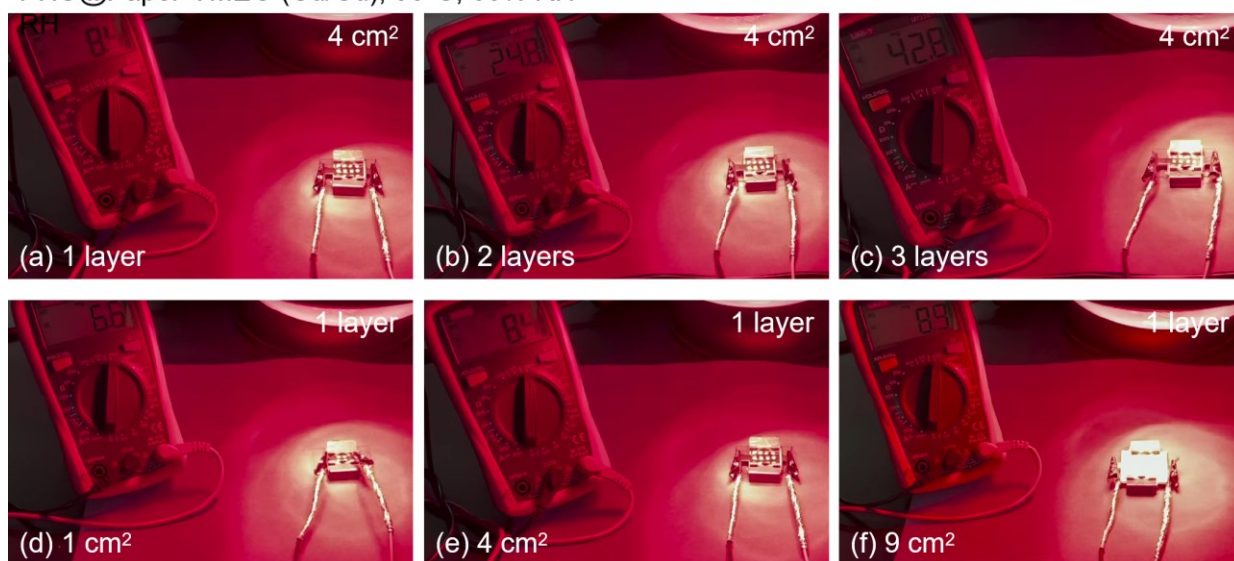

**Fig. S19** Voltage output of PHU@Paper-VMEG (Cu/Cu) with different thicknesses and areas (90°C, 60% RH).

PHU@Paper-VMEG (Cu/Cu), 90°C, dripping distilled water

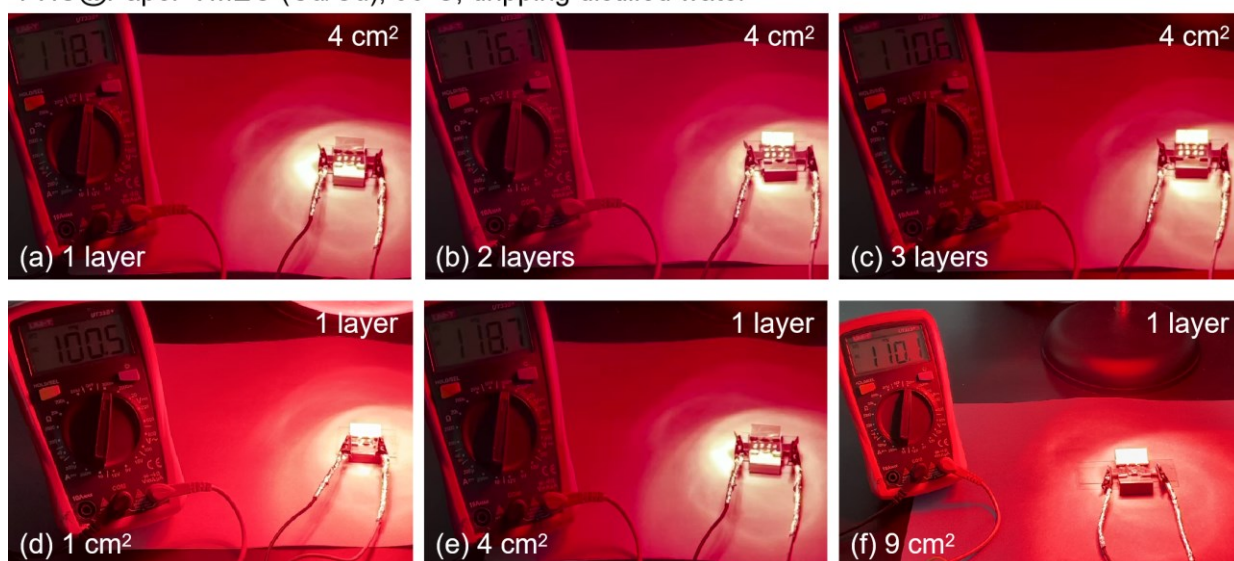

**Fig. S20** Voltage output of PHU@Paper-VMEG (Cu/Cu) with different thicknesses and areas (90°C, dripping water).

PHU@Paper-VMEG (Al/Cu), 90°C, dripping distilled water

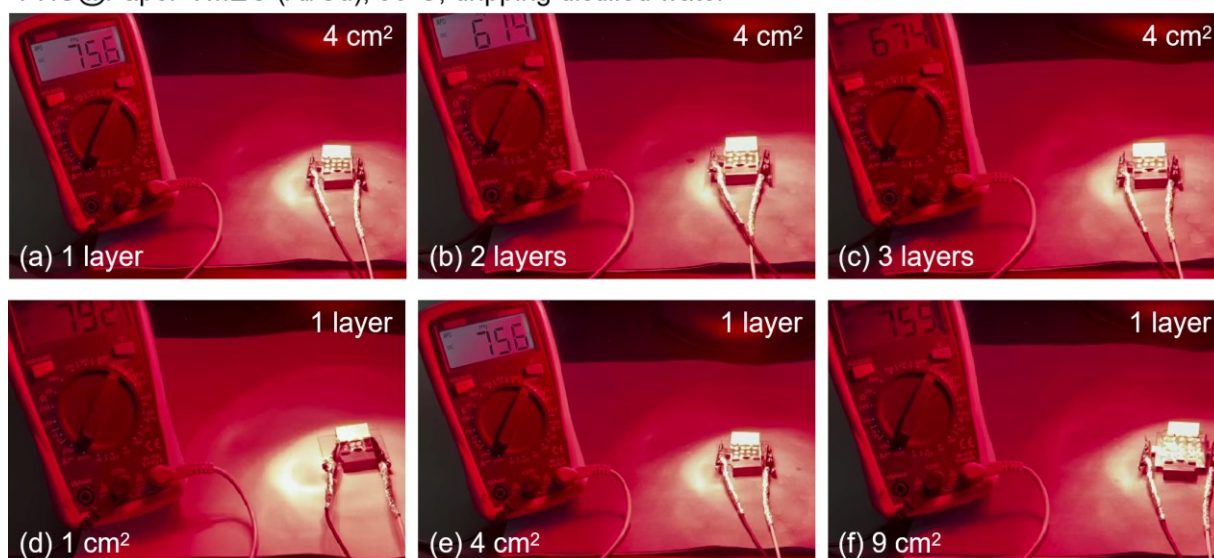

**Fig. S21** Voltage output of PHU@Paper-VMEG (Al/Cu) with different thicknesses and areas (90°C, dripping water).

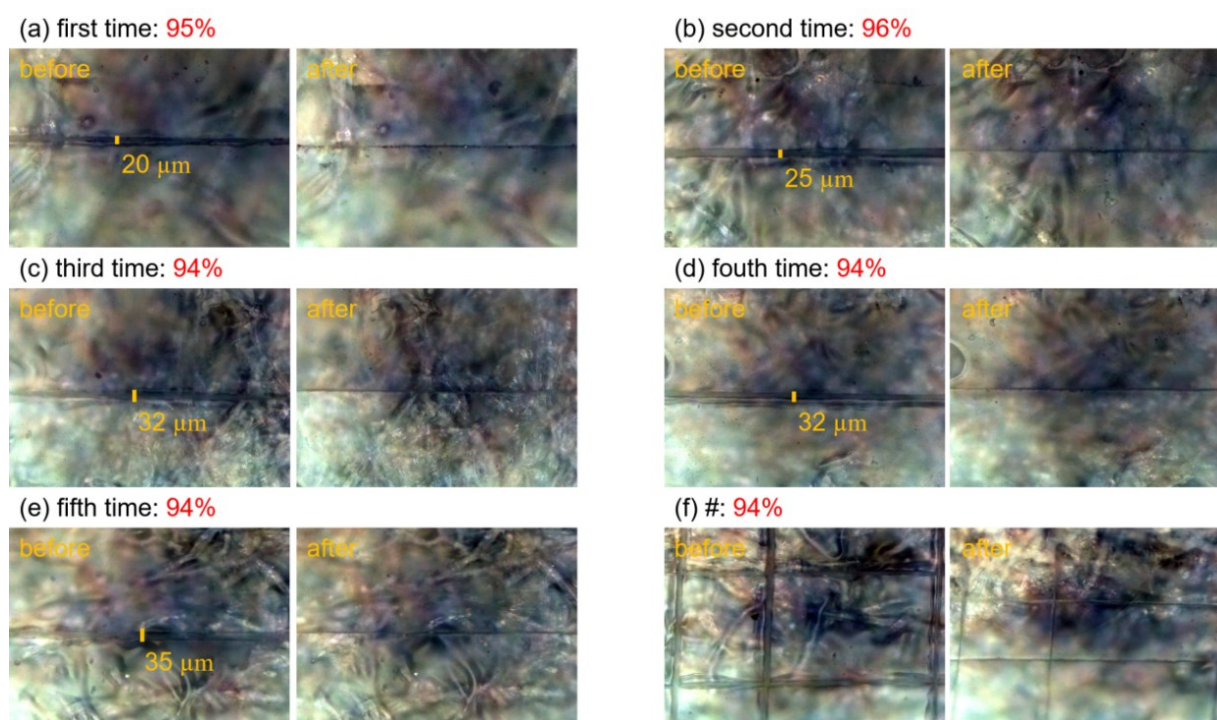

**Fig. S22** Scratch self-healing monitoring of PHU@Paper by polarizing microscopy (160°C, 10s). (a-e) Five cycles of “scratch/self-healing” at roughly the same place of PHU@Paper; (f) Self-healing of PHU@Paper with multiple scratches.

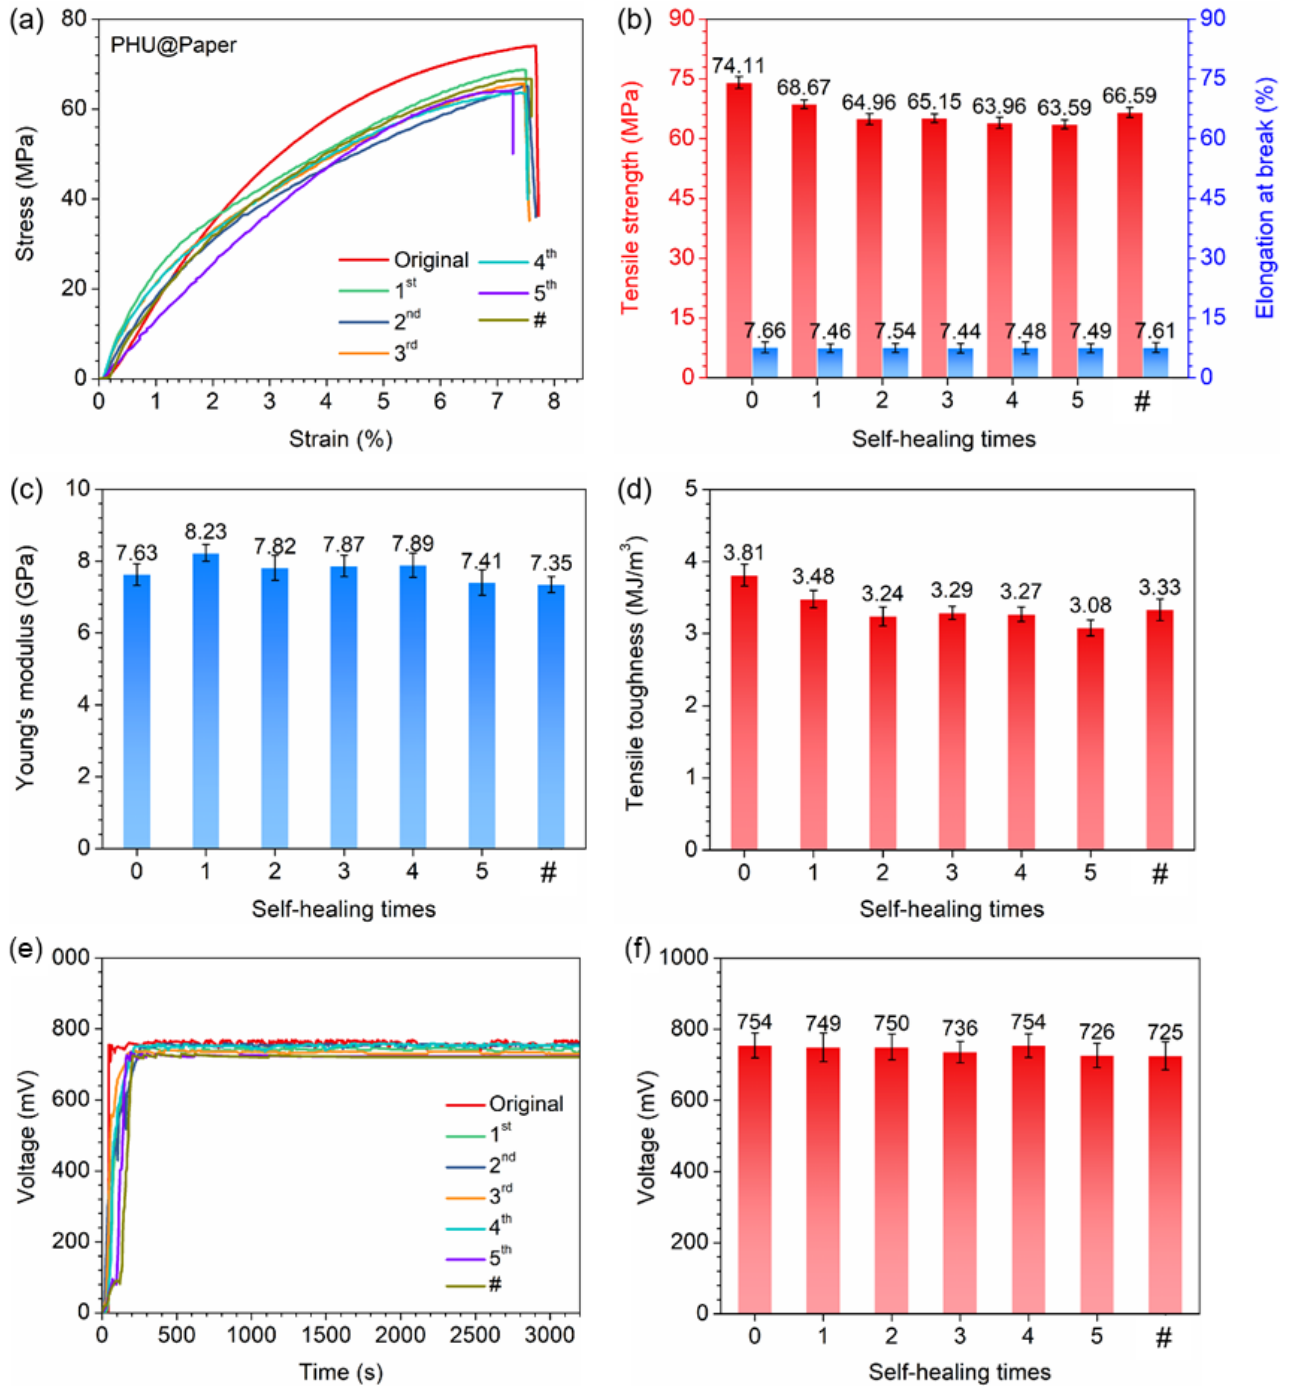

**Fig. S23** Mechanical properties and voltage outputs of PHU@Paper after self-healing from damages. (a)-(d) Mechanical properties of PHU@Paper after each instance of self-healing in “scratching/self-healing” cycling experiments; (e) Real-time monitoring of the voltage outputs of PHU@Paper-VMEG (Al/Cu) after each time of self-healing; (f) Stable voltage outputs of PHU@Paper-VMEG (Al/Cu) after each instance of self-healing.

### Discussion of Fig. S22 and Fig. S23:

Five cycles of “scratching/self-healing” were first performed at roughly the same place of PHU@Paper and the mechanical and output voltage performances of PHU@Paper after each instance of self-healing were investigated. In addition, multiple scratches were made on the surface of PHU@Paper and the corresponding performances after self-healing were also investigated. The experimental results showed that there was only a slight decrease of the mechanical properties after self-healing and no effect on the output voltage properties was observed. This is because covalent-bond based cross-linking networks can quickly rebuild between the damaged surfaces of PHU@Paper at high temperatures via highly efficient transcarbamoylation reactions between the hydroxyl groups (-OH) and carbamates (-NHCOO-).

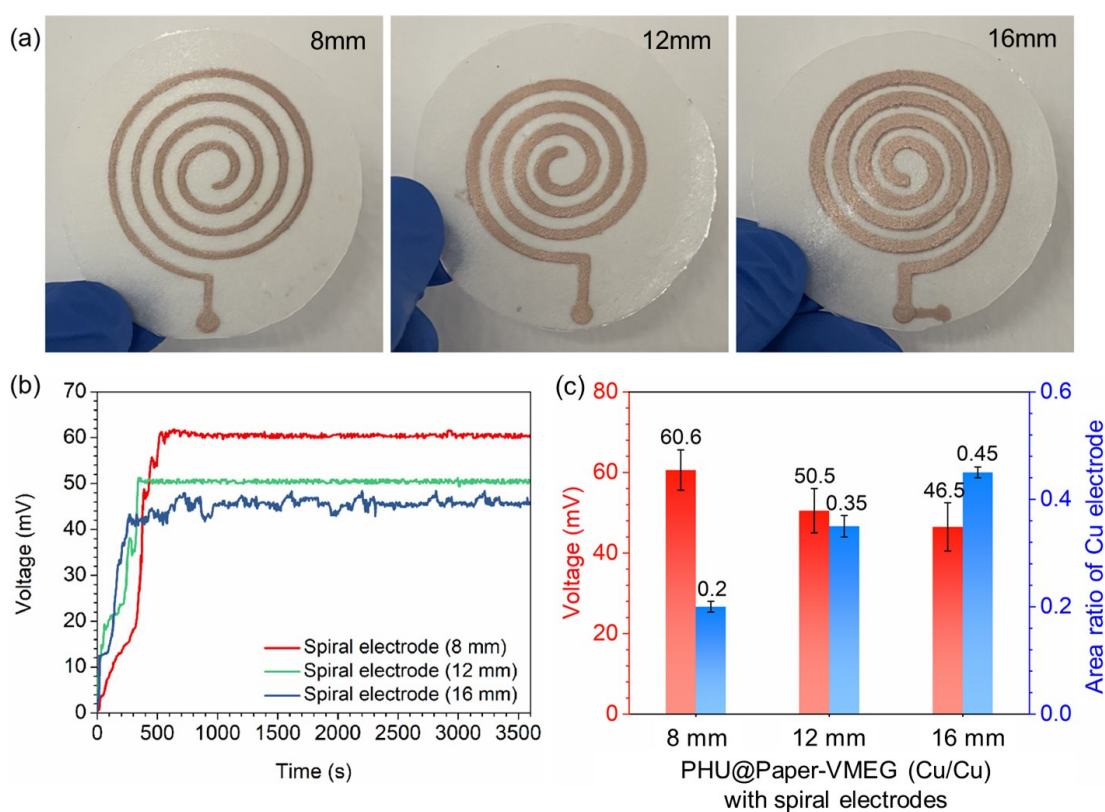

**Fig. S24** Effect of the line width of copper electrodes on the voltage output of PHU@Paper-VMEG with spiral electrodes. (a) Photographs of PHU@Paper-VMEG with different line width of spiral copper electrodes. (b) Real-time monitoring of the voltage outputs of PHU@Paper-VMEGs; (c) Stable voltages outputs of PHU@Paper-VMEGs vs. area ratio of copper electrodes (vs. PHU@Paper matrix).

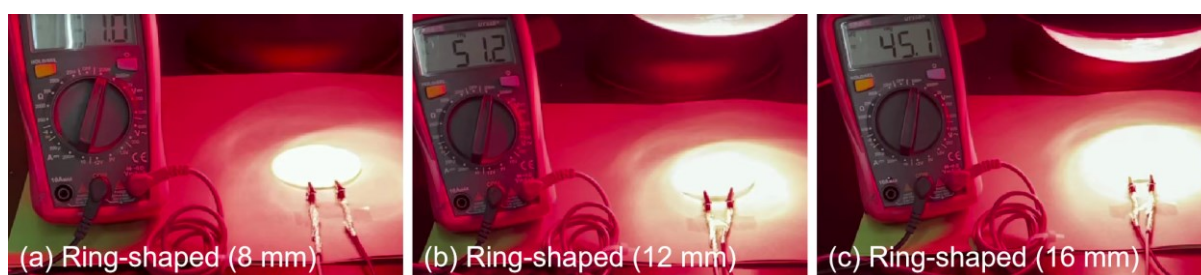

**Fig. S25** Voltage output of PHU@Paper-VMEG (Cu/Cu) with different line widths of ring-shaped electrodes. (a) 8 mm, (b) 12 mm, (c) 16 mm.

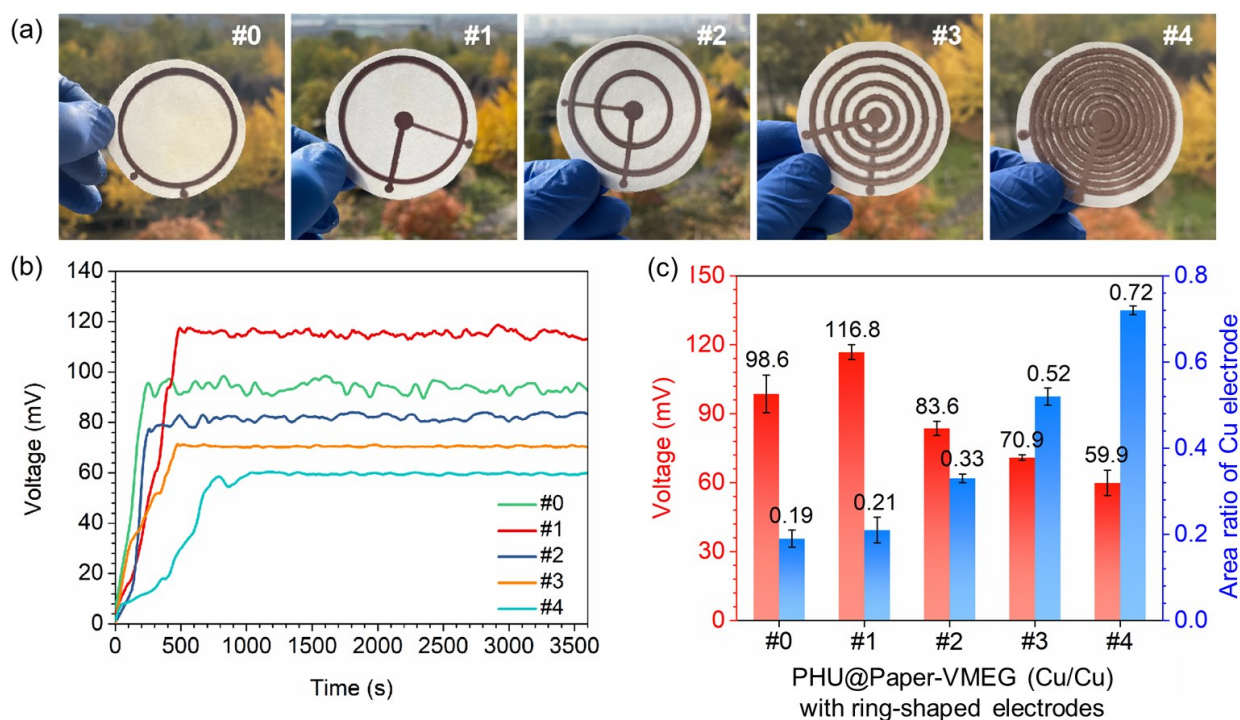

**Fig. S26** Effect of the ring number of ring-shaped copper electrodes on the voltage output of PHU@Paper-VMEG. (a) Photographs of PHU@Paper-VMEGs with different ring number of copper electrodes; (b) Real-time monitoring of the voltage outputs of PHU@Paper-VMEGs; (c) Stable voltage outputs of PHU@Paper-VMEGs vs. area ratio of copper electrode (vs. PHU@Paper matrix).

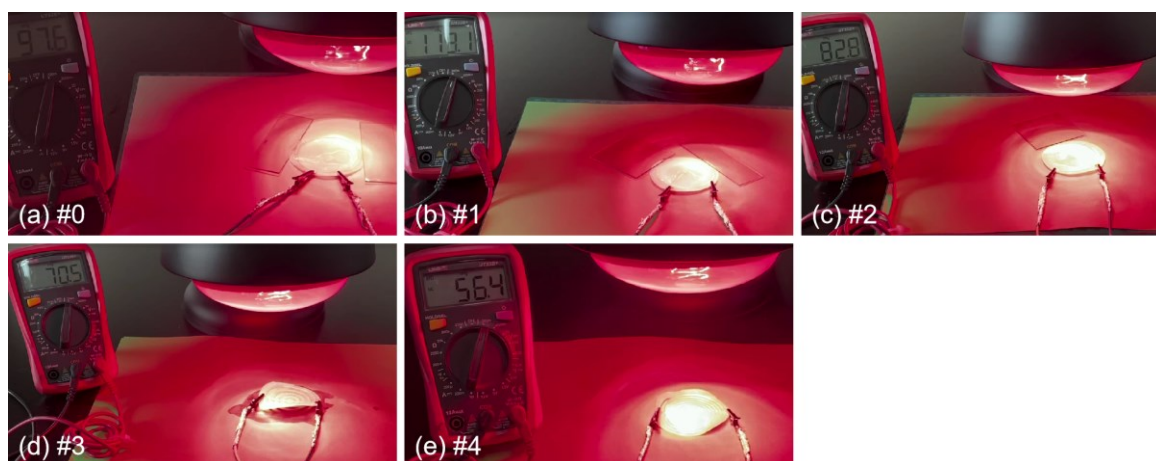

**Fig. S27** Voltage output of PHU@Paper-VMEG (Cu/Cu) with different ring number electrodes. (a) #0, (b) #1, (c) #2, (d) #3, (e) #4.

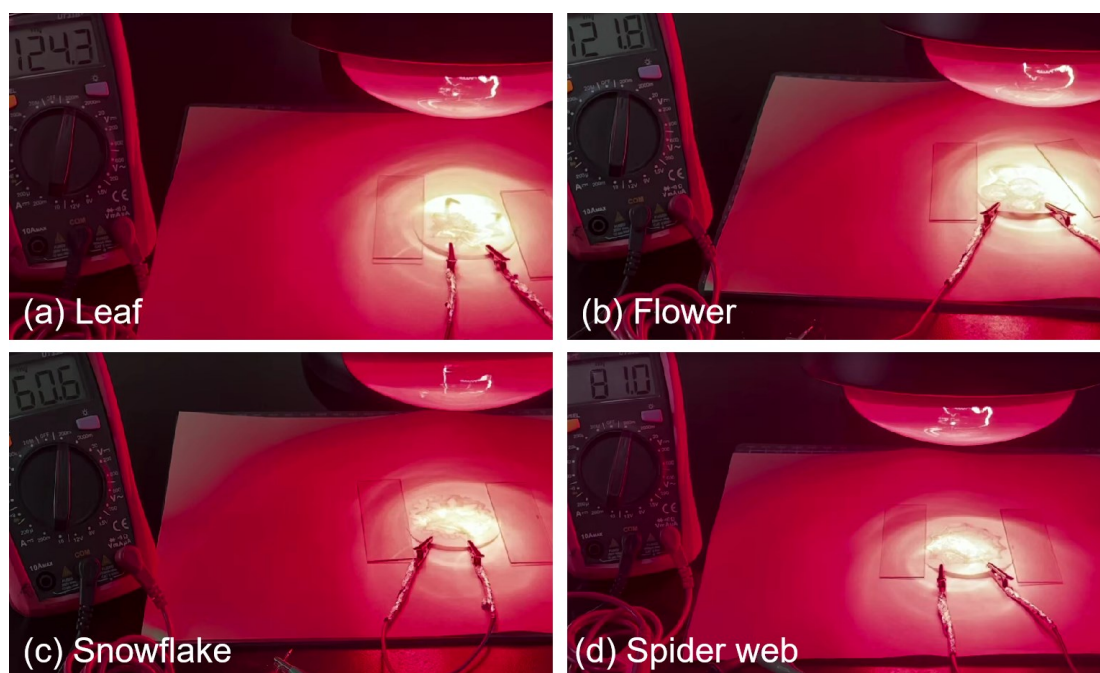

**Fig. S28** Voltage output of PHU@Paper-VMEG (Cu/Cu) with different patterns of electrodes (leaf, flower, snowflake and spider web).



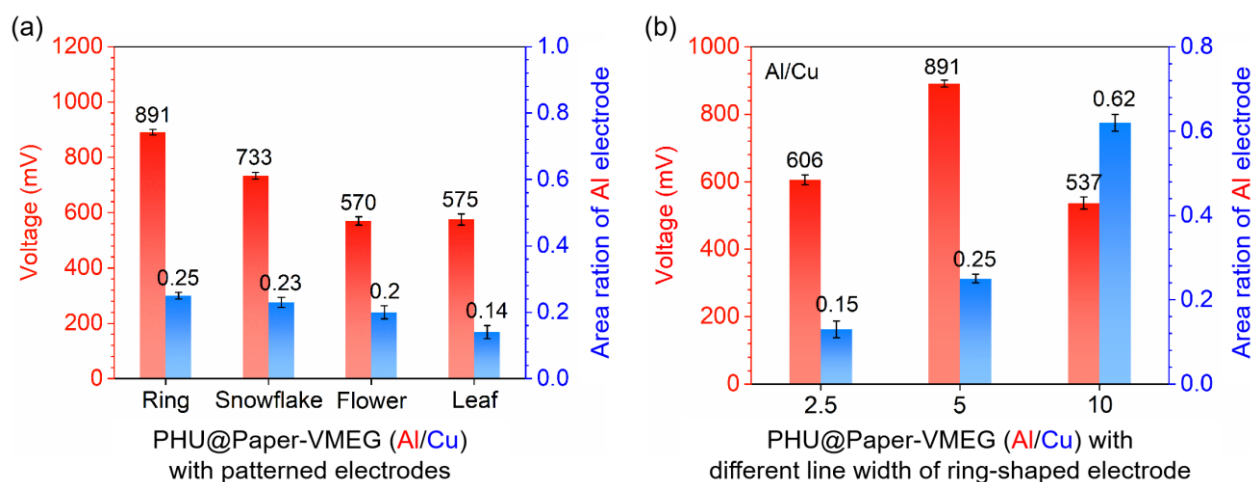

**Fig. S29** Effect of Al electrodes on the voltage output of PHU@Paper-VMEG (Al/Cu). (a) Stable voltage output of PHU@Paper-VMEGs (Al/Cu) with patterned electrodes vs. area ratio of Al electrodes; (b) Stable voltage output of PHU@Paper-VMEG with ring-shaped electrodes vs. line width of Al electrode.

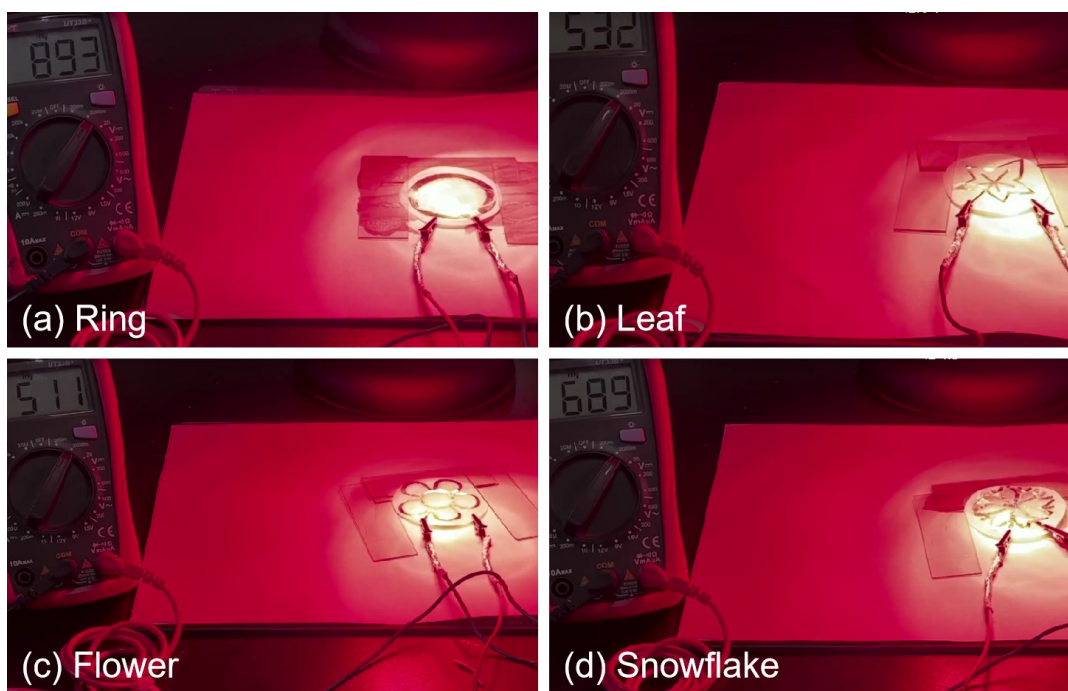

**Fig. S30** Voltage output of PHU@Paper-VMEG (Al/Cu) with different patterns of electrodes.

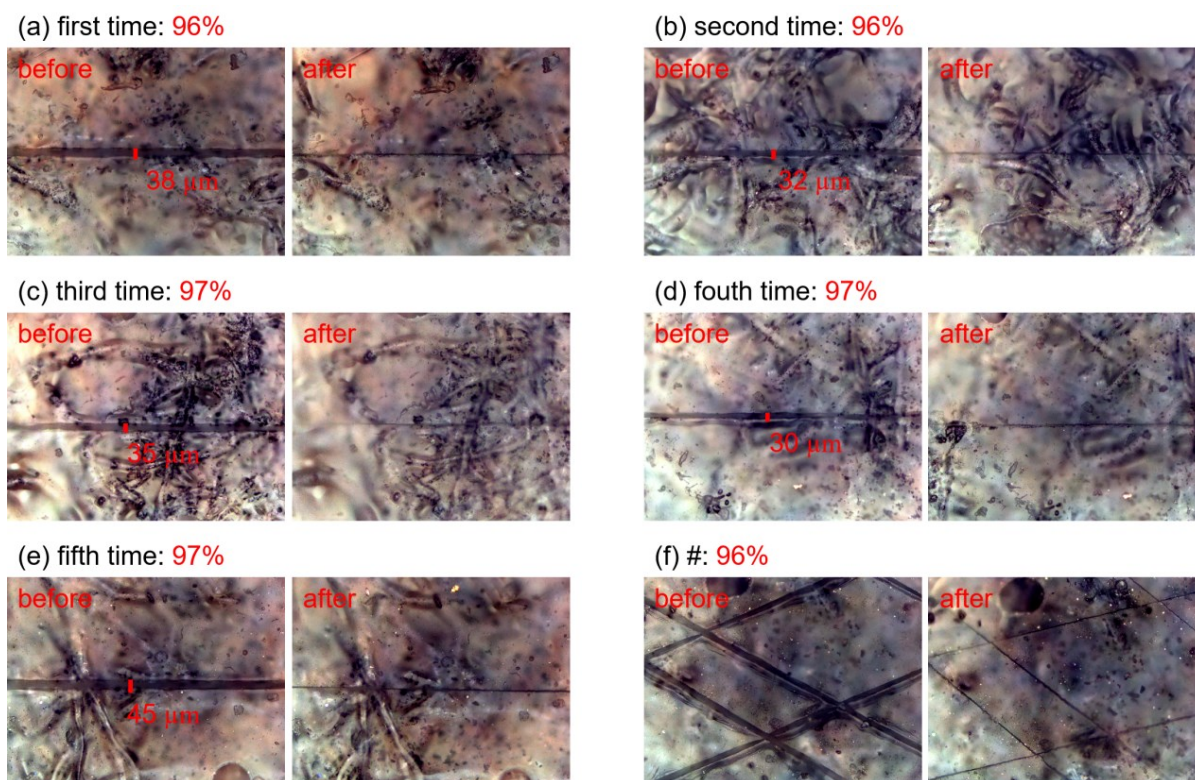

**Fig. S31** Scratch self-healing monitoring of PHU@Ti<sub>3</sub>C<sub>2</sub> by polarizing microscopy (160°C, 10s). (a-e) Five cycles of “scratch/self-healing” at roughly the same place of PHU@Ti<sub>3</sub>C<sub>2</sub>@Paper; (f) Self-healing of PHU@Ti<sub>3</sub>C<sub>2</sub>@Paper with multiple scratches.

#### **Discussion of Fig. S31 and Fig. S32:**

Five cycles of “scratching/self-healing” were first performed at roughly the same place of PHU@Ti<sub>3</sub>C<sub>2</sub>@Paper and the mechanical and output voltage performances of PHU@Ti<sub>3</sub>C<sub>2</sub>@Paper after each time of self-healing were investigated. In addition, multiple scratches were made on the surface of PHU@Ti<sub>3</sub>C<sub>2</sub>@Paper and the corresponding performances after self-healing were also investigated. The experimental results showed that there was only a slight decrease of the mechanical properties after self-healing and no effect on the output voltage properties was observed. This is because covalent-bond based cross-linking networks can quickly rebuild between the damaged surfaces of PHU@Ti<sub>3</sub>C<sub>2</sub>@Paper at high temperature via highly efficient transcaramoylation reactions between the hydroxyl groups (-OH) and carbamates (-NHCOO-).

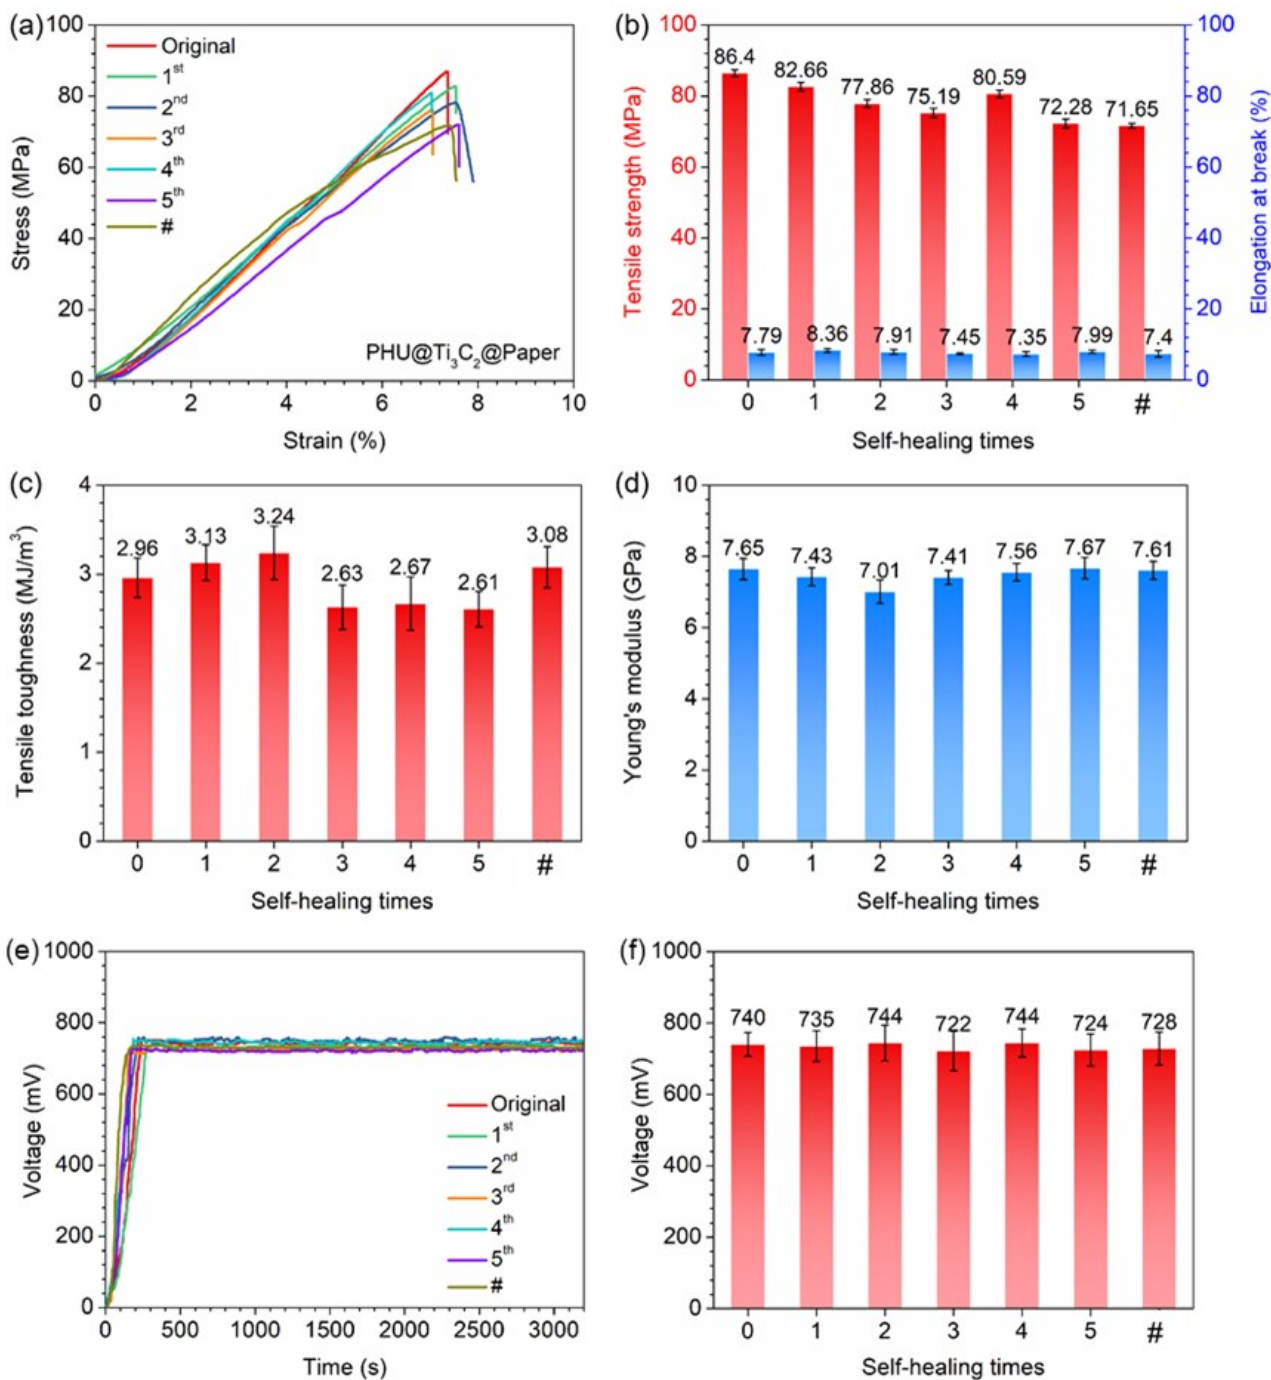

**Fig. S32** Mechanical properties and voltage outputs of PHU@Ti<sub>3</sub>C<sub>2</sub>@Paper after self-healing from damages. (a)-(d) Mechanical properties of PHU@Ti<sub>3</sub>C<sub>2</sub>@Paper after each instance of self-healing in “scratching/self-healing” cycling experiments; (e) Real-time monitoring of the voltage outputs of PHU@Ti<sub>3</sub>C<sub>2</sub>@Paper-VMEG (Al/Cu) after each instance of self-healing; (f) Stable voltages outputs of PHU@Ti<sub>3</sub>C<sub>2</sub>@Paper-VMEG (Al/Cu) after each instance of self-healing.

**Table S1** Comparison of VMEG with those reported in the literature.

| Active matrix | Electrodes | Voltage /mV | Power Density/ $\mu\text{W}/\text{cm}^2$ | Tensile Strength | Self-healing     | Water resistance | Ref. <sup>c</sup> |
|---------------|------------|-------------|------------------------------------------|------------------|------------------|------------------|-------------------|
| PSS           | Au/Au      | 800         | 17                                       | -                | No               | No               | 1                 |
| PEO           | Al/Au      | 830         | 24.3                                     | -                | No               | No               | 2                 |
| PPy           | Au/Au      | 60          | 0.69                                     | -                | No               | No               | 3                 |
| HCl/PVA       | CNT/CNT    | 348         | 47                                       | -                | No               | No               | 4                 |
| Gelation      | Al/Cu      | 710         | 5.5                                      | -                | No               | No               | 5                 |
| PSS/PVA       | AgNW/AgNW  | 600         | 7.9                                      | 75 MPa           | Yes <sup>a</sup> | No               | 6                 |
| PHU@Paper     | Al/Cu      | 740         | 26                                       | 86 MPa           | Yes <sup>b</sup> | Yes              | This study        |

Note: <sup>a</sup> Self-healing is based on hydrogen-bonding interaction and is easy to fail under high temperature and high humidity conditions; <sup>b</sup> Self-healing is based on dynamic covalent bond; <sup>c</sup> Refs: (1) *Energy Environ. Sci.*, 2019, **12**, 972-978. (2) *J. Mater. Chem. A*, 2021, **9**, 7085-7093. (3) *Adv. Funct. Mater.*, 2016, **26**, 8784-8792. (4) *Nano Energy*, 2019, **60**, 371-376. (5) *ACS Appl. Electron. Mater.*, 2020, **2**, 780-789. (6) *Nano Energy*, 2020, **67**, 104238.
